# Supplementary material for: A new and straightforward route to synthesize novel pyrazolo[3,4-b]pyridine-5-carboxylate scaffolds from 1,4-dihydropyrano[2,3-c]pyrazole-5-carbonitriles
Source: Royal Society of Chemistry journal article supplement (doi:10.1039/d2ra07521k), 2023-01-01

## Supporting information

for

### **A new and straightforward route to synthesize novel pyrazolo[3,4-*b*]pyridine-5-carboxylate scaffolds from 1,4-dihydropyrano[2,3-*c*]pyrazole-5-carbonitriles using sulfonated amorphous carbon**

Hai Truong Nguyen,<sup>a,b</sup> Phu Hoang Dang,<sup>a,b</sup> and Phuong Hoang Tran<sup>a,b,\*</sup>

<sup>a</sup>Department of Organic Chemistry, Faculty of Chemistry, University of Science, Ho Chi Minh City, 700000, Vietnam.

<sup>b</sup>Vietnam National University – Ho Chi Minh City, 700000, Vietnam.

\*Corresponding author: [thphuong@hcmus.edu.vn](mailto:thphuong@hcmus.edu.vn)

#### Table of content

|                                                                                              |               |
|----------------------------------------------------------------------------------------------|---------------|
| <b>Section S1. The mechanism proposed for the synthesis of (1b) was detected by HRMS-ESI</b> | <b>S1</b>     |
| <b>Section S2. Spectral data</b>                                                             | <b>S2-S6</b>  |
| <b>Section S3. <sup>1</sup>H, <sup>13</sup>C NMR, and HRMS spectroscopy</b>                  | <b>S7-S23</b> |

**Section S1. The mechanism proposed for the synthesis of (1b) was detected by HRMS-ESI**

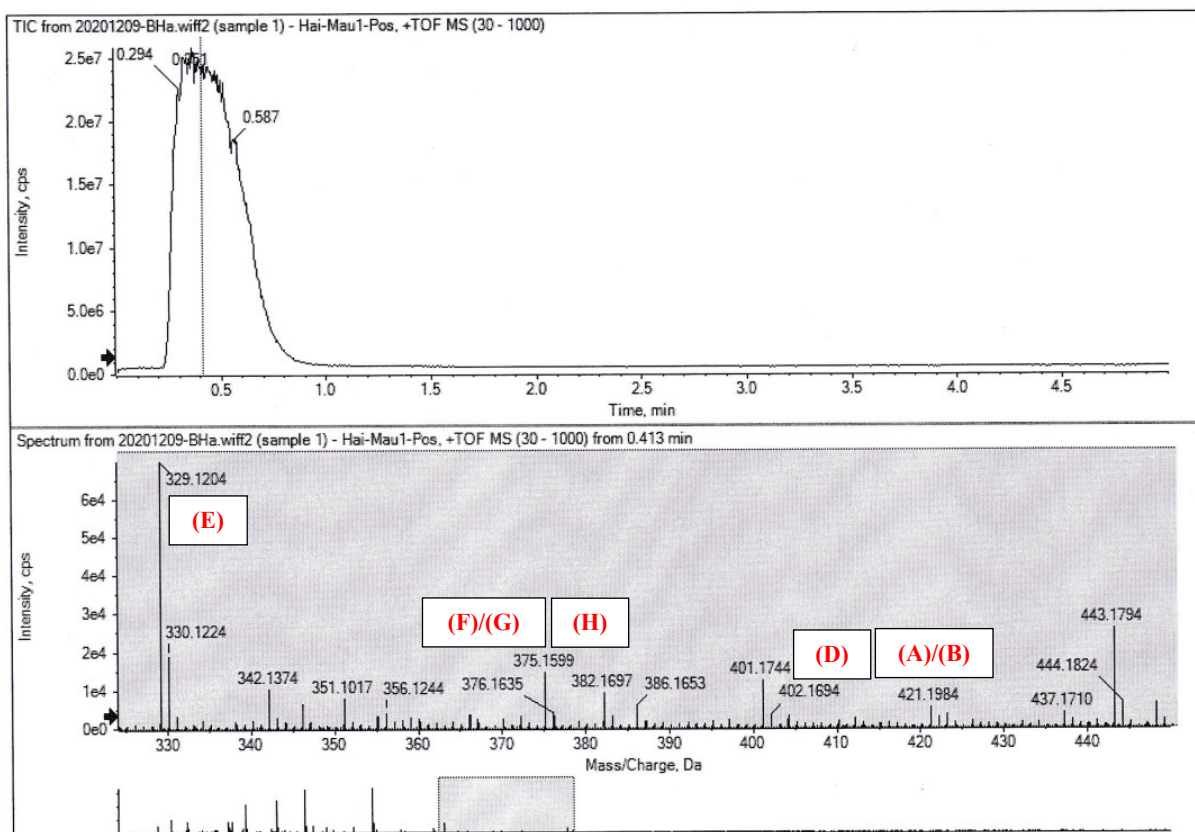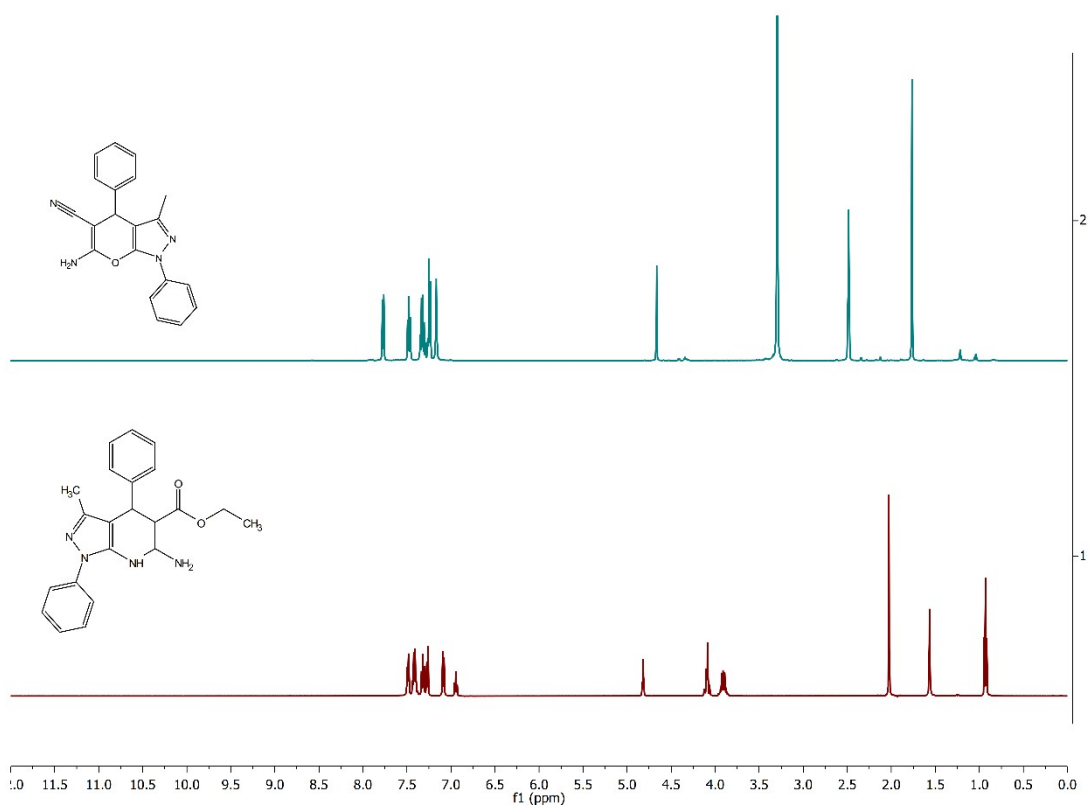

**Figure S1.**  $^1\text{H}$  NMR spectrum of 6-amino-3-methyl-1,4-diphenyl-1,4-dihydro-pyrano[2,3-*c*]pyrazole-5-carbonitrile and ethyl 3-methyl-1,4-diphenyl-4,5,6,7-tetrahydro-1*H*-pyrazolo[3,4-*b*]pyridine-5-carboxylate.

## Section S2. Spectral data

### Ethyl 6-amino-3-methyl-1,4-diphenyl-4,5,6,7-tetrahydro-1H-pyrazolo[3,4-b]pyridine-5-carboxylate (Compound 1b, Scheme 2)

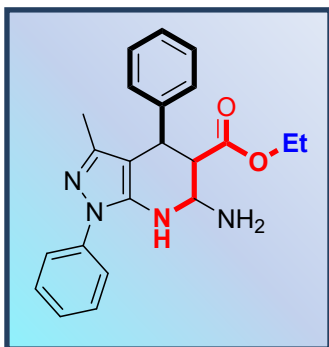

Following the general procedure: 6-Amino-3-methyl-1,4-diphenyl-1,4-dihydropyrano[2,3-*c*]pyrazole-5-carbonitrile (**1**, 0.25 mmol, 82.0 mg), and aniline (0.25 mmol, 23.5 mg) in ethanol (2.0 mL). The white solids were obtained with 84.5 mg (**1b**, 97%).  $R_f = 0.39$  (*n*-hexane/ethyl acetate = 8:2).

M.p. = 167-169 °C.

<sup>1</sup>H NMR (500 MHz, CDCl<sub>3</sub>)  $\delta$  = 7.50-7.48 (m, 2H), 7.40-7.38 (m, 3H), 7.32 (t,  $J = 8.5$  Hz, 2H), 7.27 (s, 1H), 7.09 (d,  $J = 8.0$  Hz, 2H), 6.95 (t,  $J = 7.5$  Hz, 1H), 4.82 (d,  $J = 4.5$  Hz, 1H), 4.13-4.06 (m, 2H), 3.96-3.86 (m, 2H), 2.03 (s, 3H), 0.94 (t,  $J = 7.0$  Hz, 3H).

<sup>13</sup>C NMR (125 MHz, CDCl<sub>3</sub>)  $\delta$  = 168.7, 144.4, 137.1, 134.8, 129.5, 129.3, 129.1, 128.7, 121.1, 113.1, 111.7, 111.5, 62.0, 56.2, 44.7, 27.4, 14.1, 13.7.

HRMS (ESI+)  $m/z$  calculated for C<sub>22</sub>H<sub>24</sub>N<sub>4</sub>O<sub>2</sub><sup>+</sup> [M]<sup>+</sup> 376.1899, found 376.1840.

### Ethyl 6-amino-3-methyl-1-phenyl-4-(*p*-tolyl)-4,5,6,7-tetrahydro-1H-pyrazolo[3,4-b]pyridine-5-carboxylate (Compound 2b, Scheme 2)

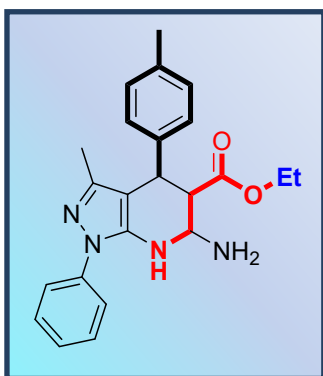

Following the general procedure: 6-Amino-3-methyl-1-phenyl-4-(*p*-tolyl)-1,4-dihydropyrano[2,3-*c*]pyrazole-5-carbonitrile (**2**, 0.25 mmol, 85.0 mg), and aniline (0.25 mmol, 23.5 mg) in Ethanol (2.0 mL). The yellow solids were obtained with 64.4 mg (**2b**, 69%).  $R_f = 0.46$  (*n*-hexane/ethyl acetate = 8:2).

M.p. = 159-161 °C.

$^1\text{H NMR}$  (500 MHz,  $\text{CDCl}_3$ )  $\delta$  = 7.37 (d,  $J$  = 7.5 Hz, 2H), 7.32 (t,  $J$  = 8.0 Hz, 2H), 7.26 (s, 1H), 7.22 (d,  $J$  = 7.5 Hz, 2H), 7.08 (d,  $J$  = 7.5 Hz, 2H), 6.94 (t,  $J$  = 7.5 Hz, 1H), 4.78 (d,  $J$  = 1.5 Hz, 1H), 4.06 (s, 2H), 3.97 – 3.87 (m, 2H), 2.36 (s, 3H), 2.02 (s, 3H), 0.96 (t,  $J$  = 7.0 Hz, 3H).

$^{13}\text{C NMR}$  (125 MHz,  $\text{CDCl}_3$ )  $\delta$  = 168.8, 144.4, 139.2, 137.3, 131.7, 129.7, 129.5, 128.5, 121.1, 113.1, 111.8, 111.6, 61.5, 56.3, 44.4, 27.6, 21.1, 14.0, 13.7.

**HRMS (ESI+)**  $m/z$  calculated for  $\text{C}_{23}\text{H}_{26}\text{N}_4\text{O}_2^+$   $[\text{M}]^+$  390.2056, found 390.1989.

**Ethyl 6-amino-3-methyl-4-(4-nitrophenyl)-1-phenyl-4,5,6,7-tetrahydro-1H-pyrazolo[3,4-*b*]pyridine-5-carboxylate (Compound 3b, Scheme 2)**

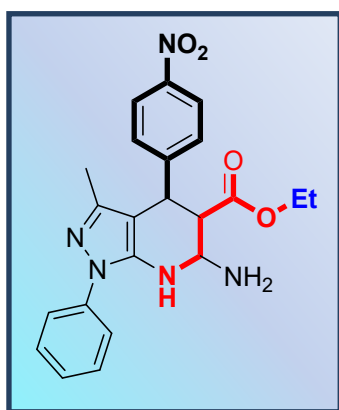

Following the general procedure: 6-Amino-3-methyl-4-(4-nitrophenyl)-1-phenyl-1,4-dihydropyrano[2,3-*c*]pyrazole-5-carbonitrile (**3**, 0.25 mmol, 93.2 mg), and aniline (0.25 mmol, 23.5 mg) in Ethanol (2.0 mL). The yellow solids were obtained with 71.1 mg (**3b**, 79%).  $R_f$  = 0.51 (*n*-hexane/ethyl acetate = 8:2).

M.p. = 163-164 °C.

$^1\text{H NMR}$  (500 MHz,  $\text{CDCl}_3$ )  $\delta$  = 8.31 (d,  $J$  = 8.5 Hz, 2H), 7.71 (d,  $J$  = 9.0 Hz, 2H), 7.35 – 7.31 (m, 3H), 7.08 (d,  $J$  = 7.5 Hz, 2H), 6.97 (t,  $J$  = 7.0 Hz, 1H), 4.90 (d,  $J$  = 5.0 Hz, 1H), 4.29 (dd,  $J$  = 5.0 Hz, 4.5 Hz, 1H), 4.07 (d,  $J$  = 11.5 Hz, 1H), 3.99 – 3.90 (m, 2H), 2.06 (s, 3H), 1.00 (t,  $J$  = 7.0 Hz, 3H).

$^{13}\text{C NMR}$  (125 MHz,  $\text{CDCl}_3$ )  $\delta$  = 168.2, 148.5, 144.1, 141.9, 136.1, 129.9, 129.6, 124.2, 121.4, 113.1, 111.2, 111.0, 62.0, 55.7, 44.3, 26.9, 14.3, 13.8.

**HRMS (ESI+)**  $m/z$  calculated for  $\text{C}_{22}\text{H}_{23}\text{N}_5\text{O}_4^+$   $[\text{M}]^+$  421.1750, found 421.1683.

**Ethyl 6-amino-4-(4-fluorophenyl)-3-methyl-1-phenyl-4,5,6,7-tetrahydro-1H-pyrazolo[3,4-*b*]pyridine-5-carboxylate (Compound 4b, Scheme 2)**

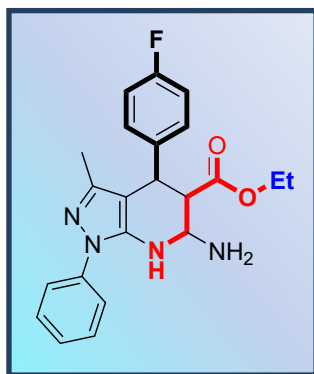

Following the general procedure: 6-Amino-4-(4-fluorophenyl)-3-methyl-1-phenyl-1,4-dihydropyrano[2,3-*c*]pyrazole-5-carbonitrile (**4**, 0.25 mmol, 86.5 mg), and aniline (0.25 mmol, 23.5 mg) in Ethanol (2.0 mL). The white solids were obtained with 71.9 mg (**4b**, 76%).  $R_f = 0.48$  (*n*-hexane/ethyl acetate = 8:2).

M.p. = 166-168 °C.

$^1\text{H NMR}$  (500 MHz,  $\text{CDCl}_3$ )  $\delta = 7.50 - 7.47$  (m, 2H), 7.33 (t,  $J = 8.0$  Hz, 2H), 7.27 (s, 1H), 7.13 (t,  $J = 8.5$  Hz, 2H), 7.08 (d,  $J = 7.5$  Hz, 2H), 6.95 (t,  $J = 7.0$  Hz, 1H), 4.84 (d,  $J = 4.5$  Hz, 1H), 4.13 (dd,  $J = 4.5$  Hz, 1H), 4.02 (d,  $J = 11.5$  Hz, 1H), 3.97 – 3.89 (m, 2H), 2.02 (s, 3H), 0.98 (t,  $J = 7.0$  Hz, 3H).

$^{13}\text{C NMR}$  (125 MHz,  $\text{CDCl}_3$ )  $\delta = 168.6, 164.2, 144.3, 136.8, 130.5$  (d,  $J = 8.3$  Hz), 129.6, 121.2, 116.3, 116.1, 113.1, 111.5 (d,  $J = 25.5$  Hz), 61.7, 56.2, 44.0, 27.4, 14.1, 13.8

**HRMS (ESI-)**  $m/z$  calculated for  $\text{C}_{22}\text{H}_{23}\text{N}_4\text{O}_2\text{F}^-$  [ $\text{M}-3\text{H}$ ] $^-$  391.1571, found 391.1581

**Ethyl 6-amino-4-(4-chlorophenyl)-3-methyl-1-phenyl-4,5,6,7-tetrahydro-1H-pyrazolo[3,4-*b*]pyridine-5-carboxylate (Compound 5b, Scheme 2)**

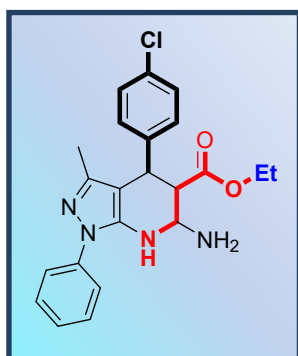

Following the general procedure: 6-Amino-4-(4-chlorophenyl)-3-methyl-1-phenyl-1,4-dihydropyrano[2,3-*c*]pyrazole-5-carbonitrile (**5**, 0.25 mmol, 90.5 mg), and aniline (0.25 mmol, 23.5 mg) in Ethanol (2.0 mL). The white solids were obtained with 66.2 mg (**5b**, 67%).  $R_f = 0.49$  (*n*-hexane/ethyl acetate = 8:2).

M.p. = 167-168 °C.

$^1\text{H NMR}$  (500 MHz,  $\text{CDCl}_3$ )  $\delta = 7.64$  (d,  $J = 8.0$  Hz, 1H), 7.56 (d,  $J = 8.5$  Hz, 1H), 7.49 – 7.44 (m, 1H), 7.37 (d,  $J = 8.5$  Hz, 1H), 7.31 (t,  $J = 8.0$  Hz, 2H), 7.27 (s, 1H), 7.13 (d,  $J = 8.5$  Hz, 1H),

7.06 (d,  $J = 8.0$  Hz, 2H), 6.94 (t,  $J = 7.5$  Hz, 1H), 4.82 (d,  $J = 4.5$  Hz, 1H), 4.09 (dd,  $J = 4.5$  Hz, 1H), 4.01 (d,  $J = 11.5$  Hz, 1H), 3.98 – 3.90 (m, 2H), 2.02 (s, 3H), 0.98 (t,  $J = 7.5$  Hz, 3H).

$^{13}\text{C}$  NMR (125 MHz,  $\text{CDCl}_3$ )  $\delta = 168.5, 144.3, 136.7, 133.8, 132.4, 132.0, 130.3, 129.6, 129.6, 129.3, 126.9, 123.6, 121.3, 121.2, 113.1, 111.3, 61.8, 55.9, 44.1, 37.0, 27.2, 14.2, 13.8$ .

HRMS (ESI-)  $m/z$  calculated for  $\text{C}_{22}\text{H}_{21}\text{ClN}_4\text{O}_2^-$   $[\text{M}-2\text{H}]^-$  408.1354, found 408.1244

**Ethyl 6-amino-4-(4-bromophenyl)-3-methyl-1-phenyl-4,5,6,7-tetrahydro-1H-pyrazolo[3,4-b]pyridine-5-carboxylate (Compound 6b, Scheme 2)**

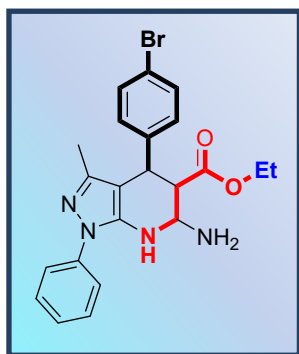

Following the general procedure: 6-Amino-4-(4-bromophenyl)-3-methyl-1-phenyl-1,4-dihydropyrano[2,3-c]pyrazole-5-carbonitrile (**6**, 0.25 mmol, 101.5 mg), and aniline (0.25 mmol, 23.5 mg) in Ethanol (2.0 mL). The white solids were obtained with 55.8 mg (**6b**, 56%).  $R_f = 0.50$  ( $n$ -hexane/ethyl acetate = 8:2).

M.p. = 166-167 °C.

$^1\text{H}$  NMR (500 MHz,  $\text{CDCl}_3$ )  $\delta = 7.65$  (d,  $J = 8.0$  Hz, 1H), 7.57 (d,  $J = 8.5$  Hz, 2H), 7.48 (t,  $J = 8.5$  Hz, 1H), 7.38 (d,  $J = 8.5$  Hz, 1H), 7.32 (t,  $J = 8.0$  Hz, 2H), 7.27 (s, 1H), 7.14 (d,  $J = 8.5$  Hz, 1H), 7.07 (d,  $J = 8.0$  Hz, 1H), 6.95 (t,  $J = 7.5$  Hz, 1H), 4.83 (d,  $J = 4.5$  Hz, 1H), 4.11 (dd,  $J = 4.5$  Hz, 1H), 4.03 (d,  $J = 11.5$  Hz, 1H), 3.98 – 3.90 (m, 2H), 2.03 (s, 3H), 1.00 (t,  $J = 7.5$  Hz, 3H).

$^{13}\text{C}$  NMR (125 MHz,  $\text{CDCl}_3$ )  $\delta = 168.5, 144.3, 136.7, 133.8, 132.4, 132.0, 130.3, 129.6, 129.6, 129.3, 126.9, 123.6, 121.3, 121.2, 113.1, 111.3, 61.8, 55.9, 44.1, 37.0, 27.2, 14.2, 13.8, 12.9$ .

HRMS (ESI+)  $m/z$  calculated for  $\text{C}_{22}\text{H}_{24}\text{N}_4\text{O}_2\text{Br}^+$   $[\text{M}+\text{H}]^+$  455.1082, found 455.0896.

**Ethyl 6-amino-4-(furan-2-yl)-3-methyl-1-phenyl-4,5,6,7-tetrahydro-1H-pyrazolo[3,4-b]pyridine-5-carboxylate (Compound 7b, Scheme 2)**

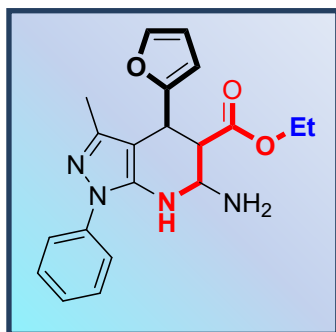

Following the general procedure: 6-Amino-4-(furan-2-yl)-3-methyl-1-phenyl-1,4-dihydropyrano[2,3-*c*]pyrazole-5-carbonitrile (**7**, 0.25 mmol, 79.5 mg), and aniline (0.25 mmol, 23.5 mg) in Ethanol (2.0 mL). The white solids were obtained with 52.3 mg (**7b**, 71%).  $R_f = 0.58$  (*n*-hexane/ethyl acetate = 8:2).

M.p. = 173-174 °C.

<sup>1</sup>H NMR (500 MHz, CDCl<sub>3</sub>)  $\delta = 7.48$  (s, 1H), 7.31 (t,  $J = 8.0$  Hz, 2H), 7.25 (s, 1H), 7.06 (d,  $J = 8.0$  Hz, 2H), 6.94 (t,  $J = 7.5$  Hz, 1H), 6.50 (d,  $J = 3.0$  Hz, 1H), 6.41 – 6.40 (m, 1H), 4.78 (d,  $J = 5.0$  Hz, 1H), 4.33 (dd,  $J = 5.0$  Hz, 1H), 4.12 – 4.02 (m, 2H), 2.00 (s, 3H), 1.12 (t,  $J = 7.0$  Hz, 3H).

<sup>13</sup>C NMR (125 MHz, CDCl<sub>3</sub>)  $\delta = 168.7, 148.4, 144.3, 143.5, 136.7, 129.5, 129.2, 121.1, 120.1, 113.1, 111.5, 111.1, 110.8, 110.1, 61.8, 55.0, 39.3, 26.0, 14.3, 13.9$ .

HRMS (ESI+)  $m/z$  calculated for C<sub>20</sub>H<sub>22</sub>N<sub>4</sub>O<sub>3</sub><sup>+</sup> [M]<sup>+</sup> 366.1692, found 366.1629.

**Ethyl 6-amino-3-methyl-4-(5-nitrofuran-2-yl)-1-phenyl-4,5,6,7-tetrahydro-1H-pyrazolo[3,4-*b*]pyridine-5-carboxylate (Compound 8b, Scheme 2)**

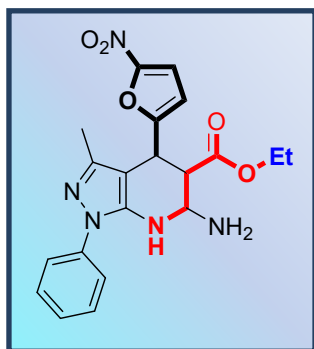

Following the general procedure: 6-Amino-4-(5-nitrofuran-2-yl)-3-methyl-1-phenyl-1,4-dihydropyrano[2,3-*c*]pyrazole-5-carbonitrile (**9**, 0.25 mmol, 90.7 mg), and aniline (0.25 mmol, 23.5 mg) in Ethanol (2.0 mL). The white solids were obtained with 67.3 mg (**9b**, 68%).  $R_f = 0.56$  (*n*-hexane/ethyl acetate = 8:2).

M.p. = 179-180 °C.

<sup>1</sup>H NMR (500 MHz, CDCl<sub>3</sub>)  $\delta = 7.50$  (s, 1H), 7.32 (t,  $J = 8.0$  Hz, 2H), 7.27 (s, 1H), 7.08 – 7.06 (d,  $J = 8.0$  Hz, 2H), 6.95 (t,  $J = 7.5$  Hz, 1H), 6.51 (d,  $J = 3.0$  Hz, 1H), 6.42 (m, 1H), 4.79 (d,  $J = 5.0$  Hz, 1H), 4.12 – 4.03 (m, 2H), 2.01 (s, 3H), 1.14 (t,  $J = 7.0$  Hz, 3H).

<sup>13</sup>C NMR (125 MHz, CDCl<sub>3</sub>)  $\delta = 168.9, 148.6, 144.5, 143.7, 136.9, 129.7, 129.3, 121.3, 120.2, 113.3, 111.6, 111.3, 111.0, 110.3, 62.0, 55.2, 39.5, 26.2, 14.5, 14.1$ .

HRMS (ESI+)  $m/z$  calculated for C<sub>20</sub>H<sub>21</sub>N<sub>5</sub>O<sub>5</sub><sup>+</sup> [M]<sup>+</sup> 411.1543, found 411.1787.

### Section S3. <sup>1</sup>H, <sup>13</sup>C NMR, and HRMS spectroscopy

#### <sup>1</sup>H, <sup>13</sup>C, COSY, HMMBC, HSQC NMR, and HRMS spectroscopy of ethyl 6-amino-3-methyl-1,4-diphenyl-4,5,6,7-tetrahydro-1H-pyrazolo[3,4-b]pyridine-5-carboxylate (Compound 1b)

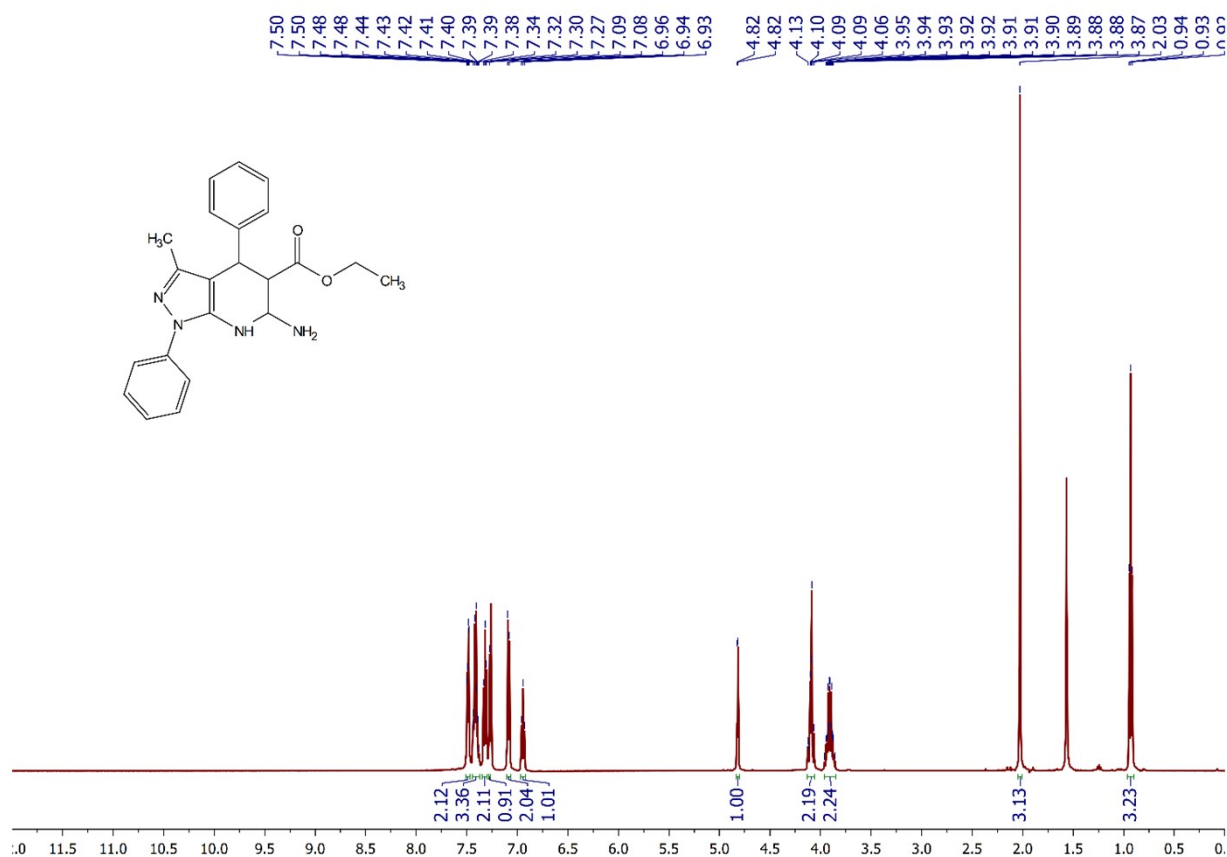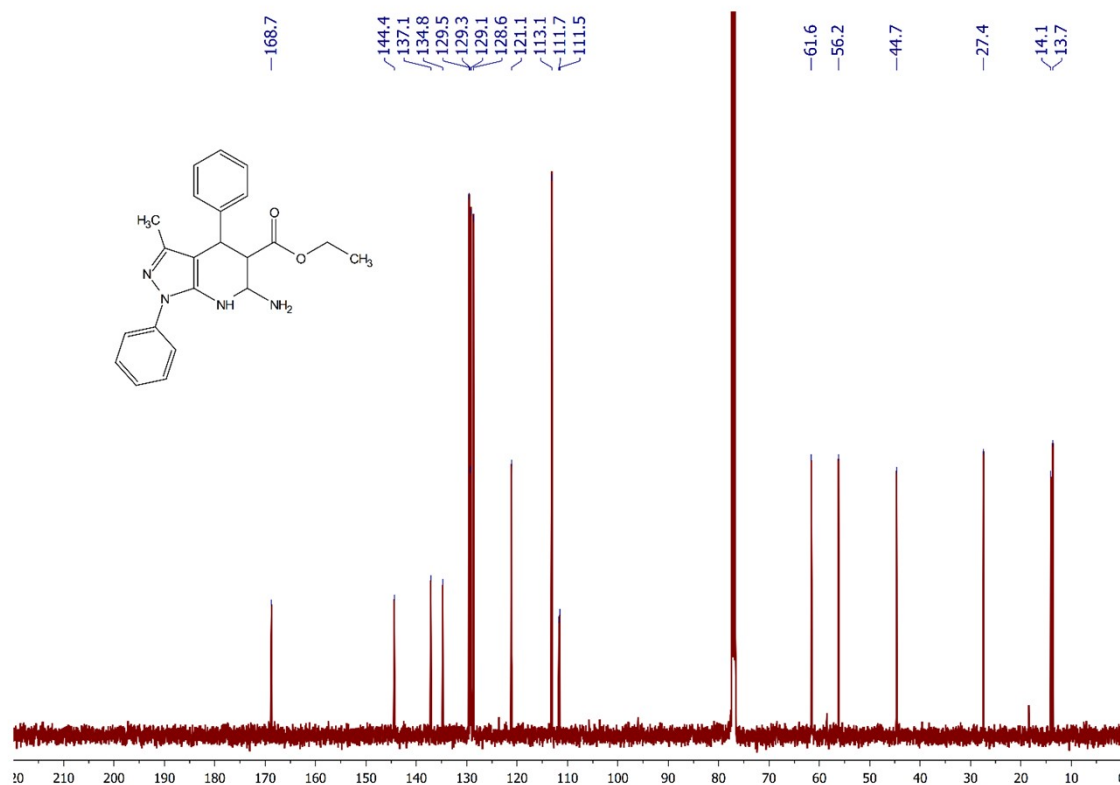



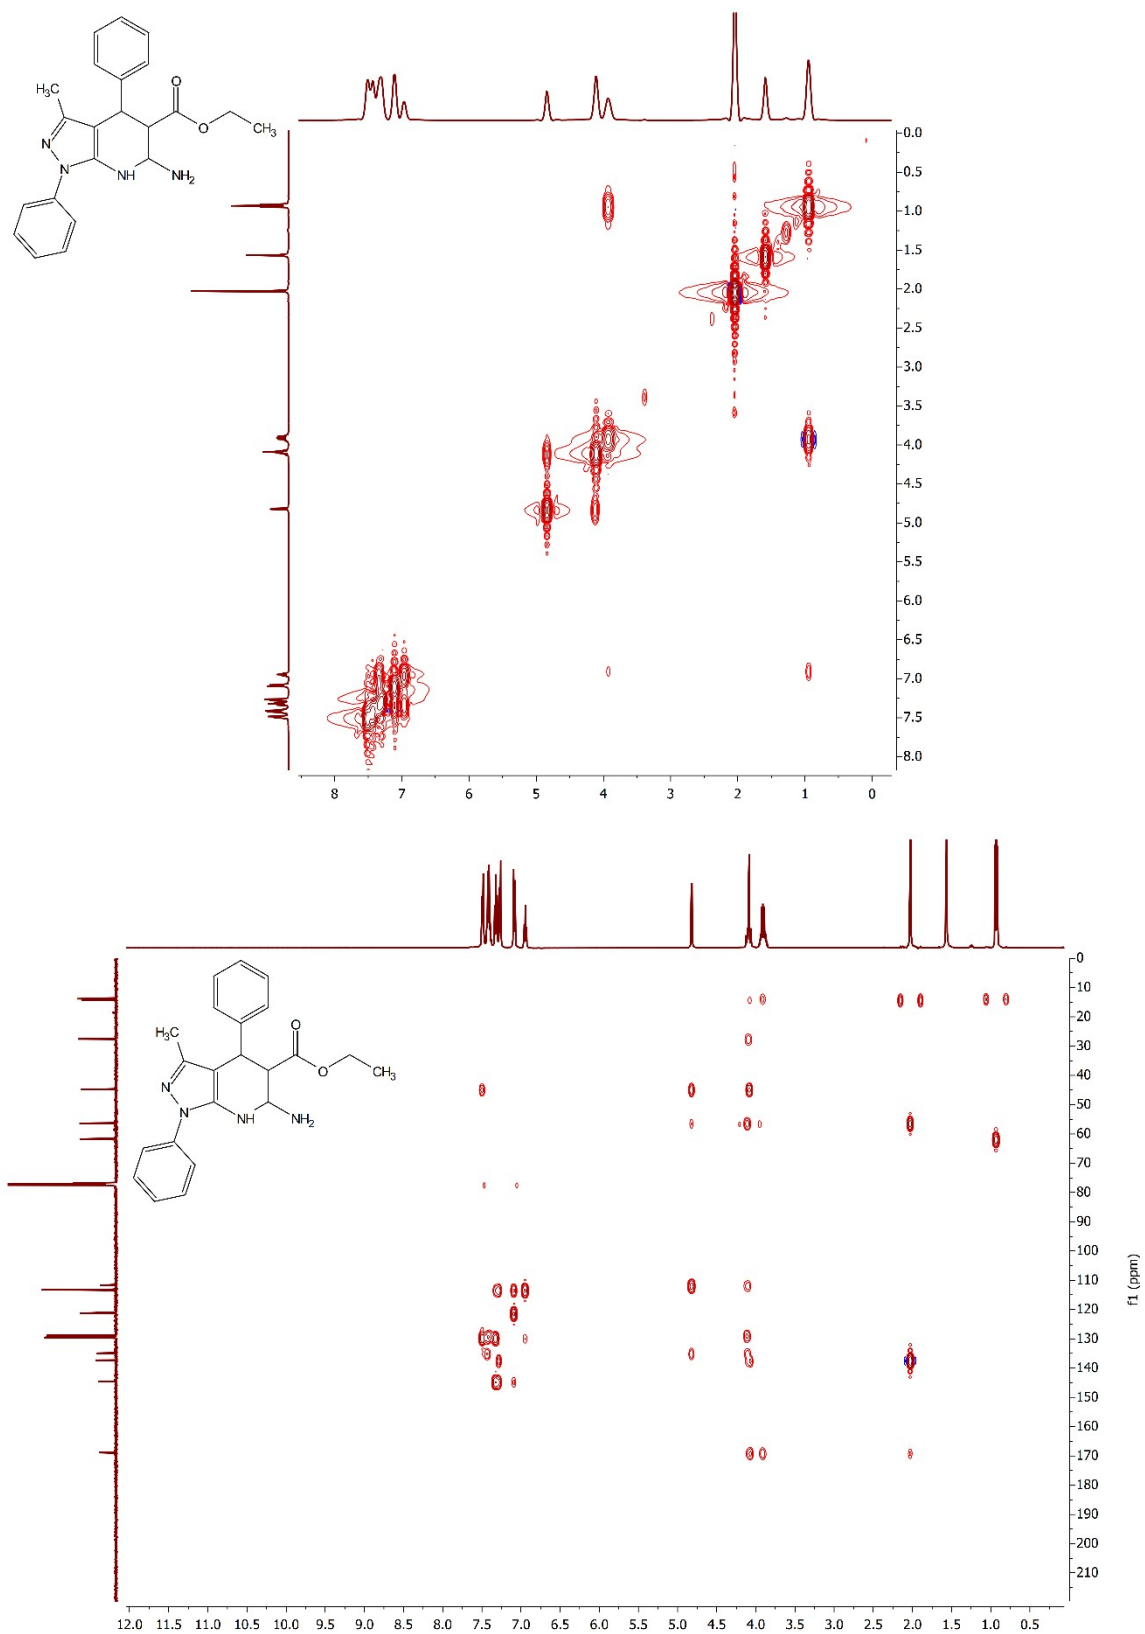

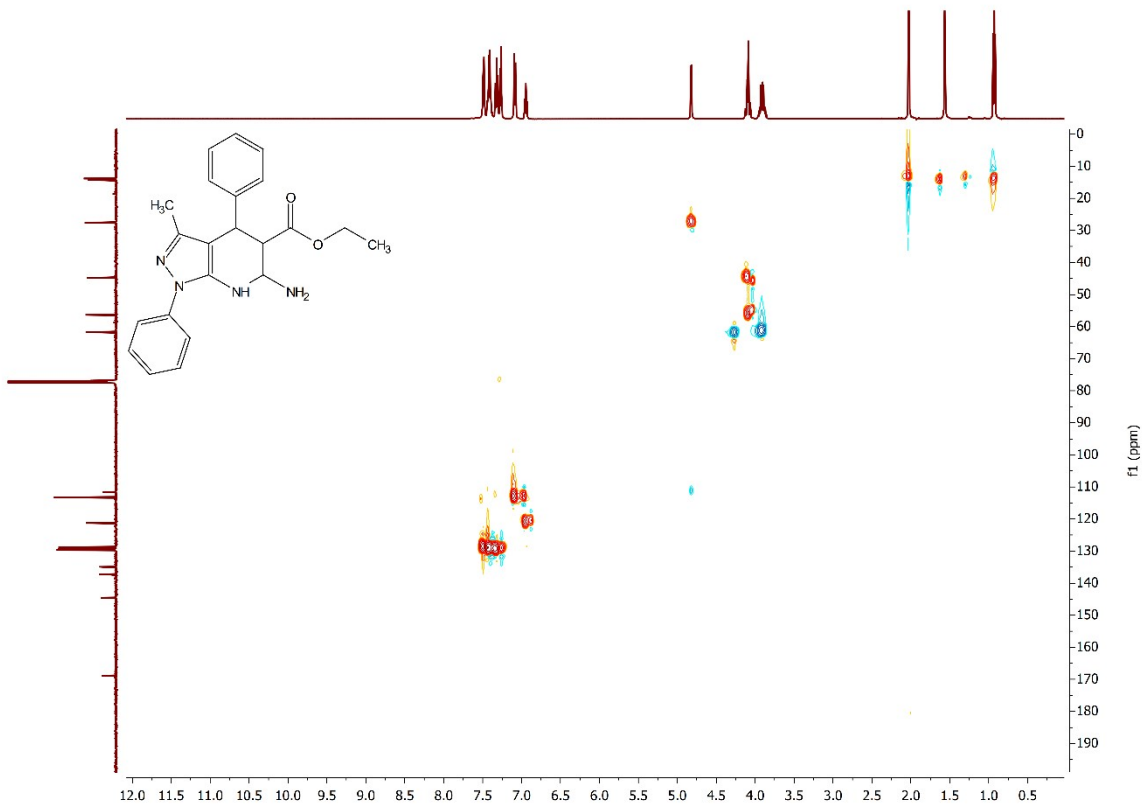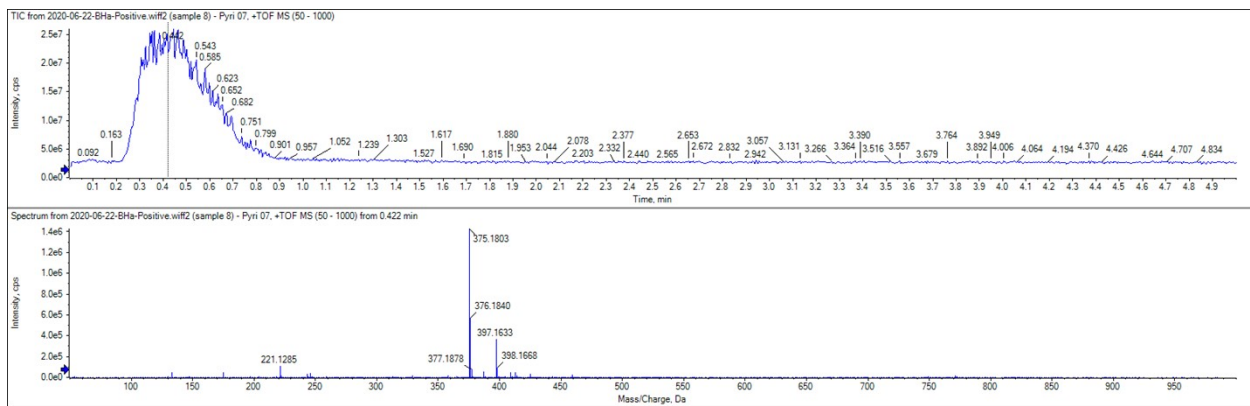

**$^1\text{H}$ ,  $^{13}\text{C}$  NMR, and HRMS spectroscopy of Ethyl 6-amino-3-methyl-1-phenyl-4-(*p*-tolyl)-4,5,6,7-tetrahydro-1*H*-pyrazolo[3,4-*b*]pyridine-5-carboxylate (Compound 2b)**

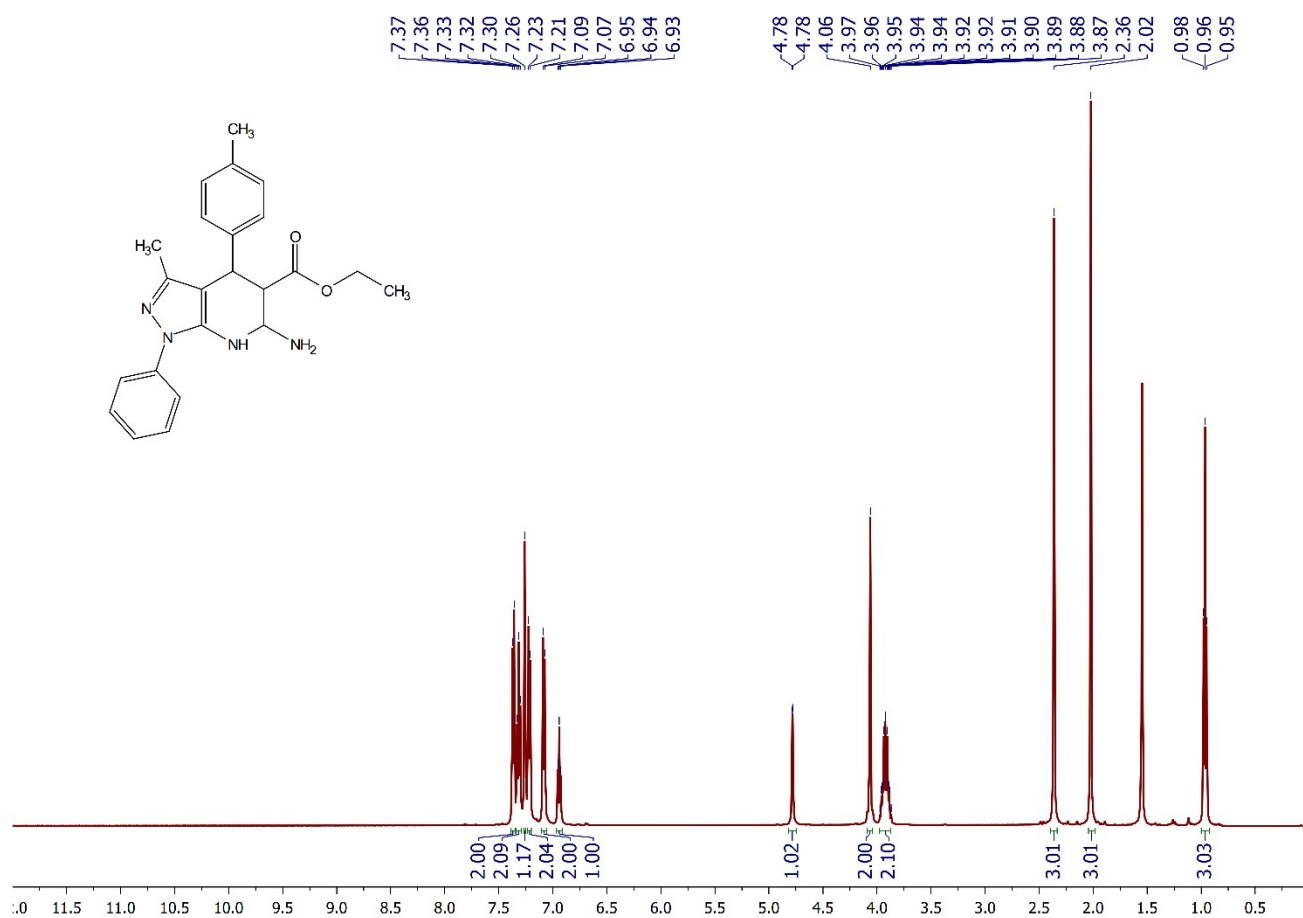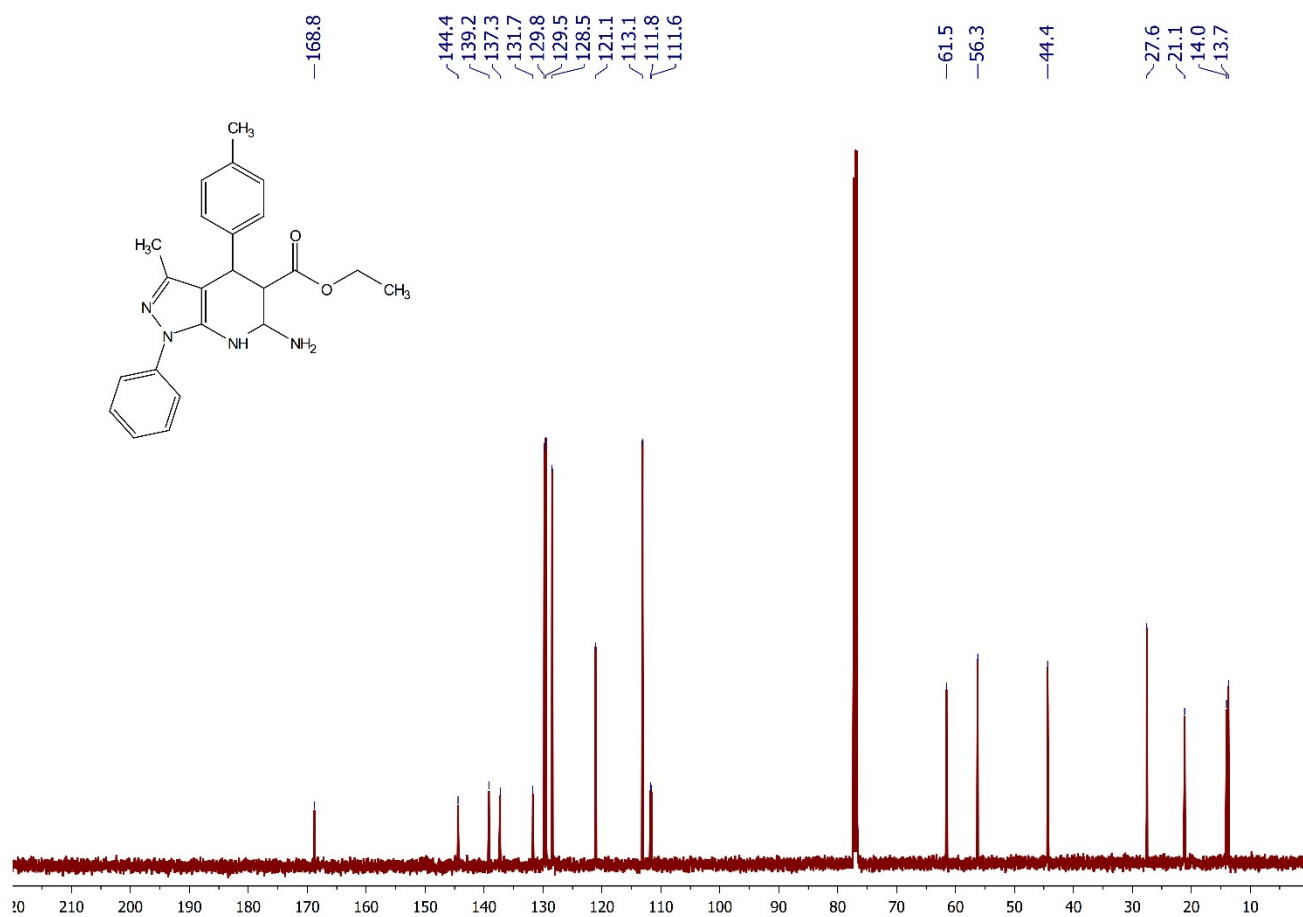

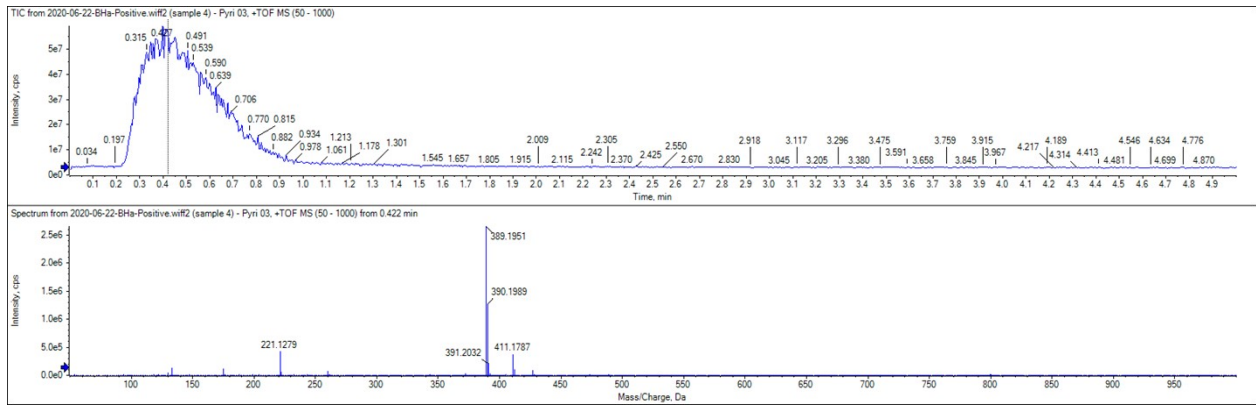

**$^1\text{H}$ ,  $^{13}\text{C}$  NMR, and HRMS spectroscopy of Ethyl 6-amino-3-methyl-4-(4-nitrophenyl)-1-phenyl-4,5,6,7-tetrahydro-1*H*-pyrazolo[3,4-*b*]pyridine-5-carboxylate (Compound 4b)**

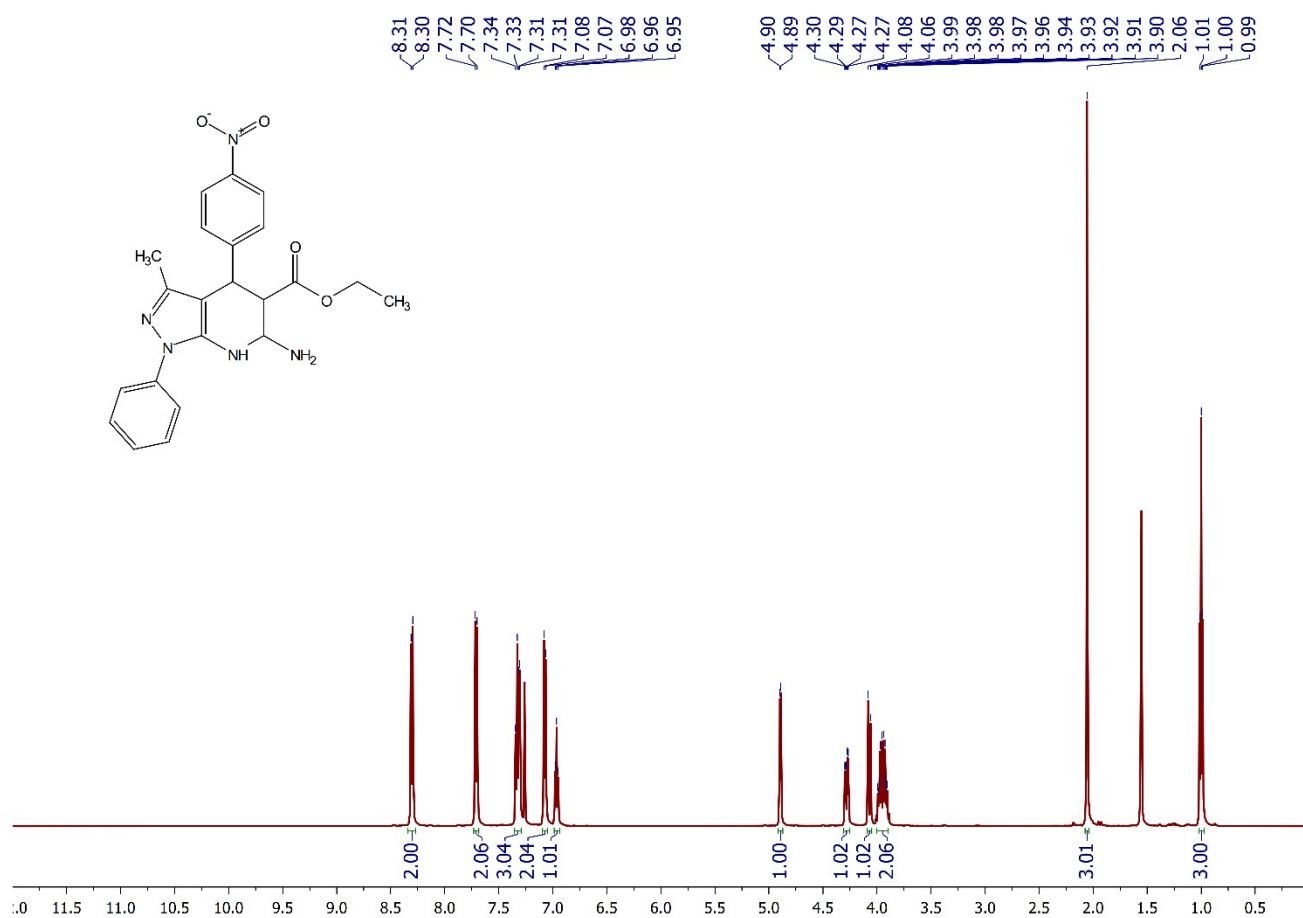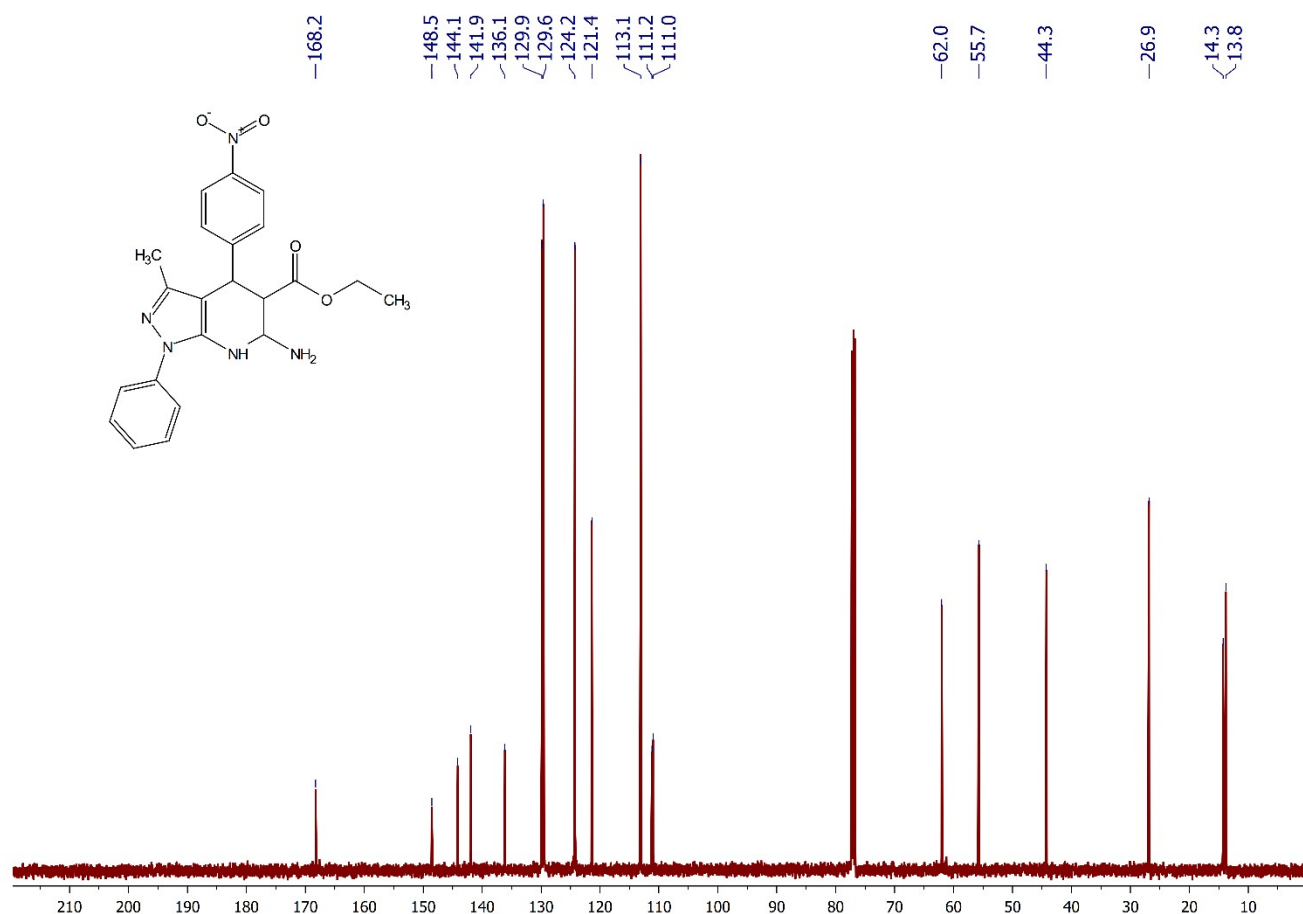

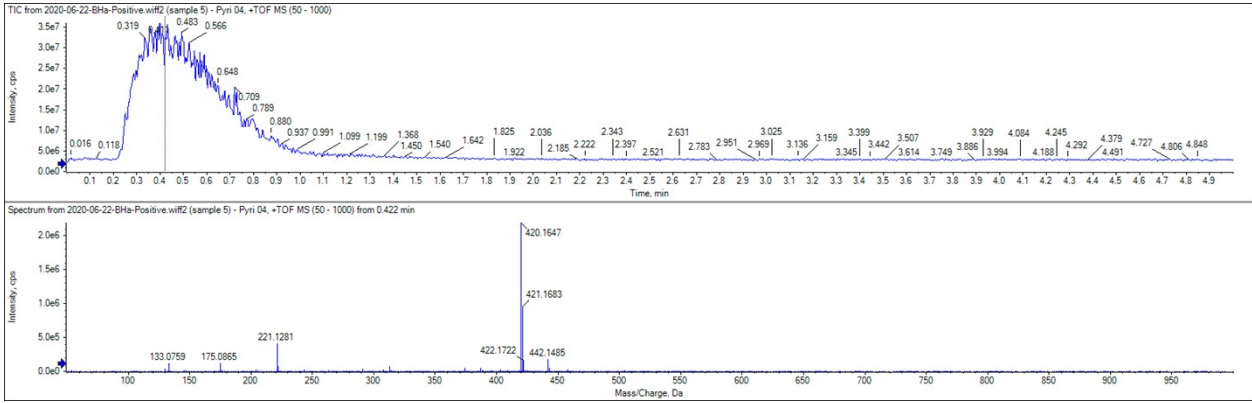

**<sup>1</sup>H, <sup>13</sup>C NMR, and HRMS spectroscopy of Ethyl 6-amino-4-(4-fluorophenyl)-3-methyl-1-phenyl-4,5,6,7-tetrahydro-1H-pyrazolo[3,4-b]pyridine-5-carboxylate (Compound 5b)**

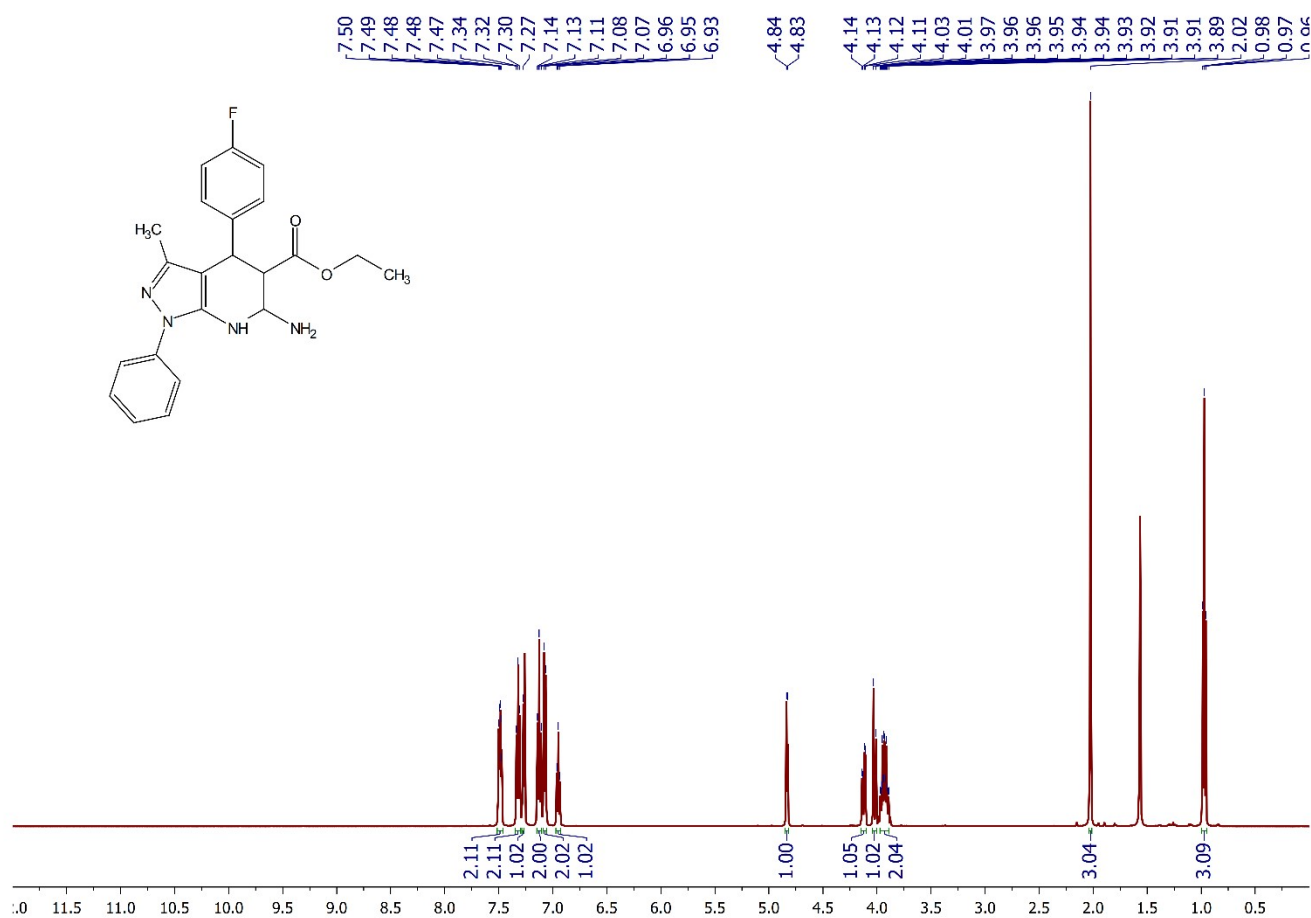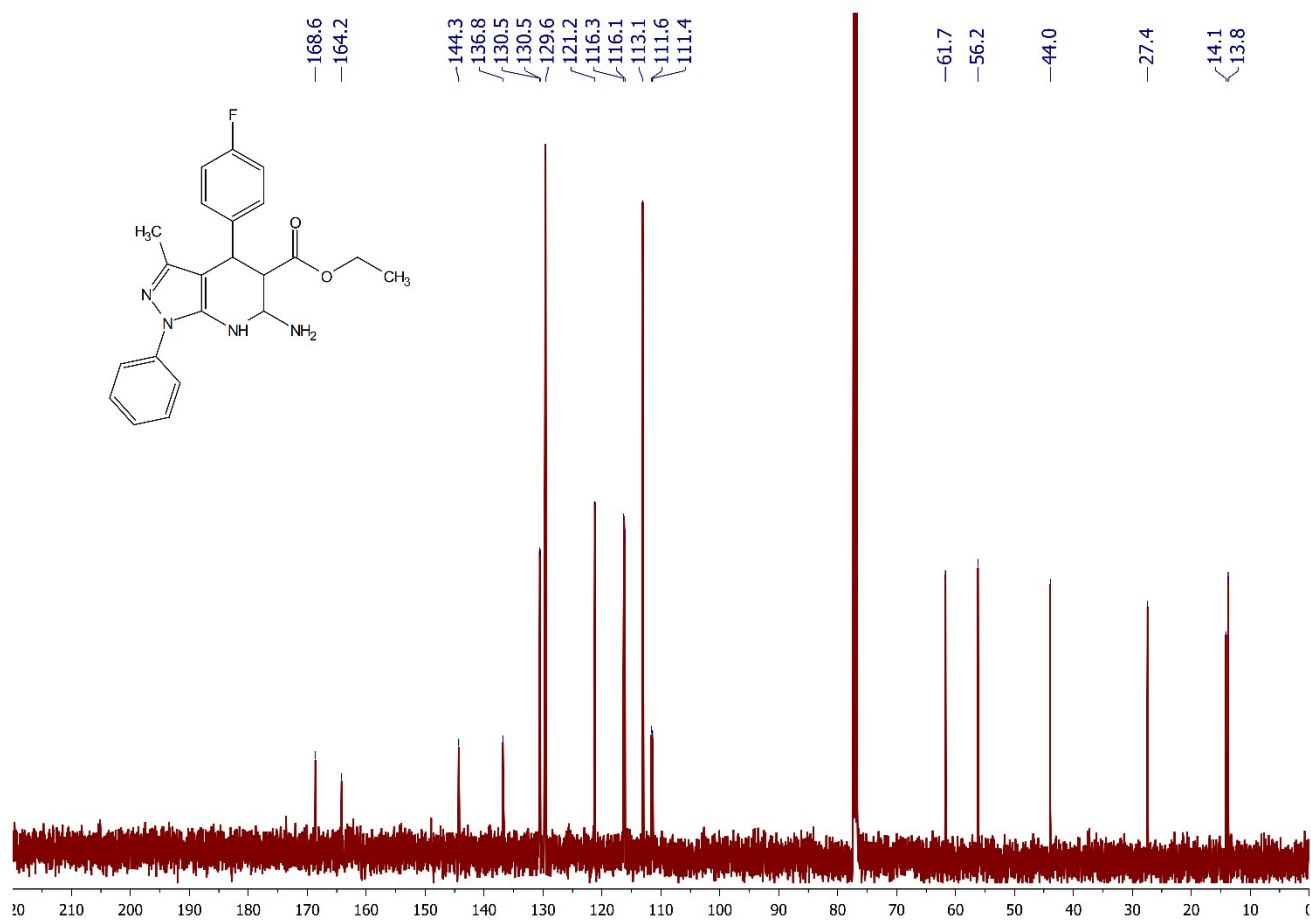

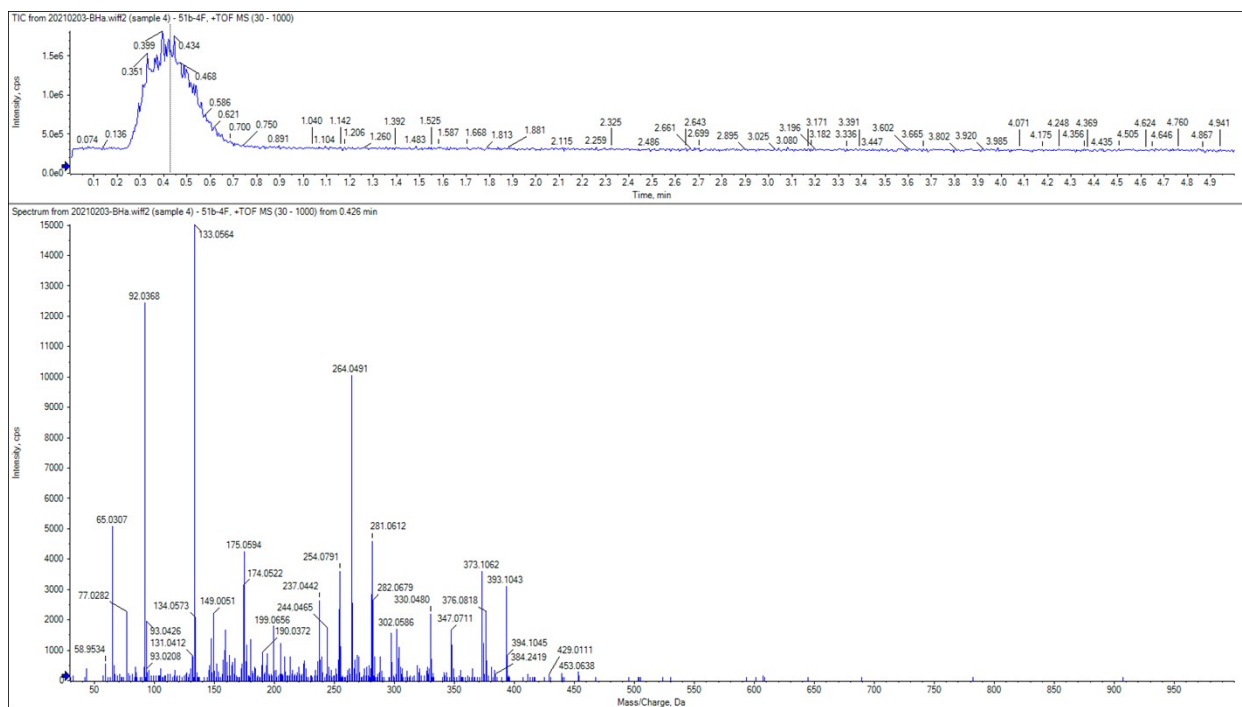



**$^1\text{H}$ ,  $^{13}\text{C}$  NMR, and HRMS spectroscopy of Ethyl 6-amino-4-(4-chlorophenyl)-3-methyl-1-phenyl-4,5,6,7-tetrahydro-1*H*-pyrazolo[3,4-*b*]pyridine-5-carboxylate (Compound 6b)**

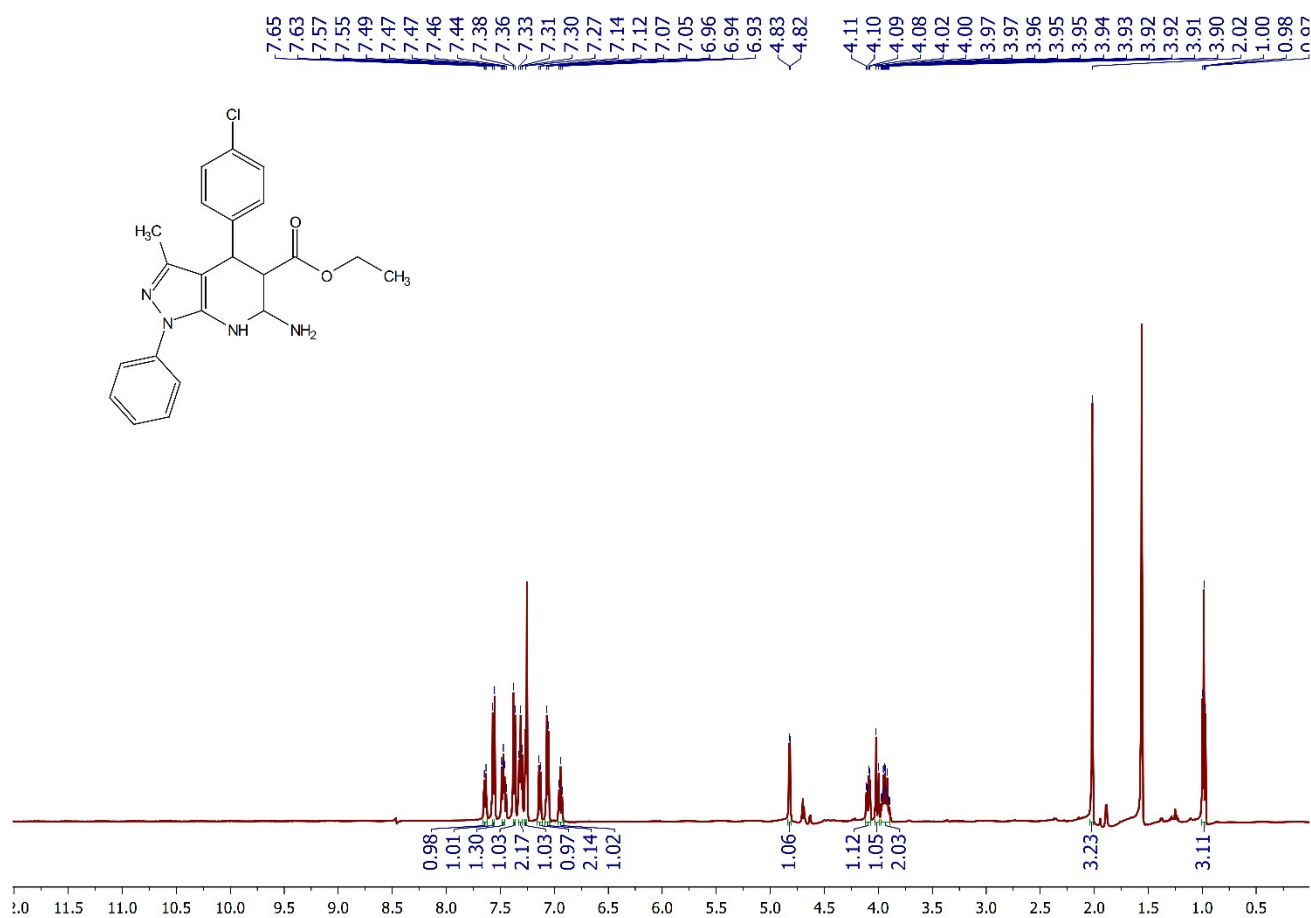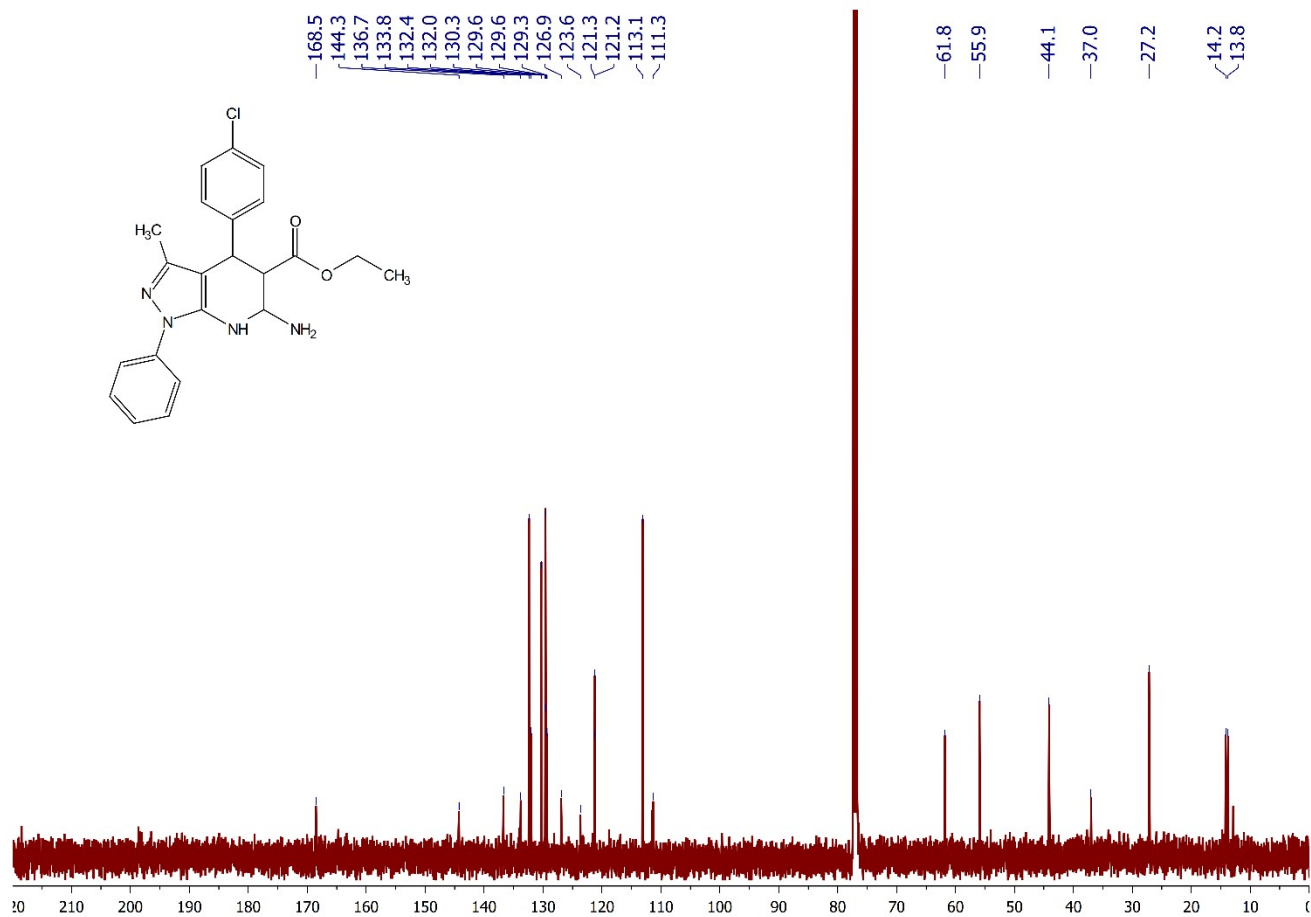

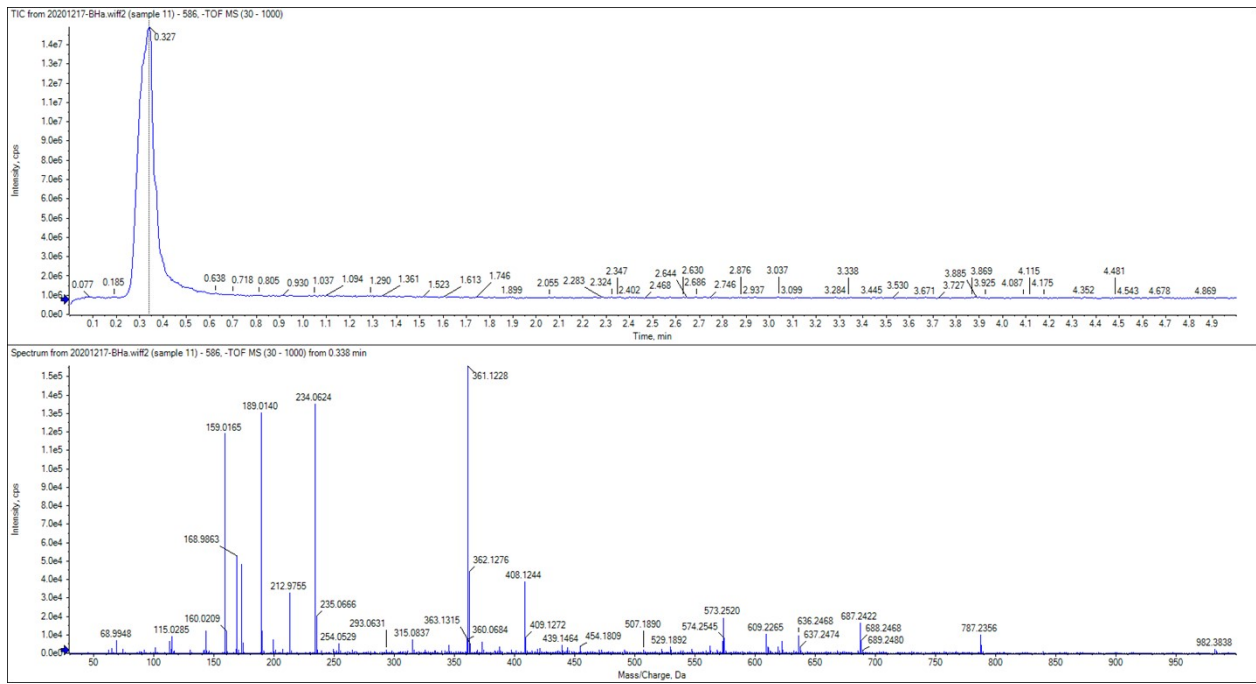

**$^1\text{H}$ ,  $^{13}\text{C}$  NMR, and HRMS spectroscopy of Ethyl 6-amino-4-(4-bromophenyl)-3-methyl-1-phenyl-4,5,6,7-tetrahydro-1*H*-pyrazolo[3,4-*b*]pyridine-5-carboxylate (Compound 7b)**

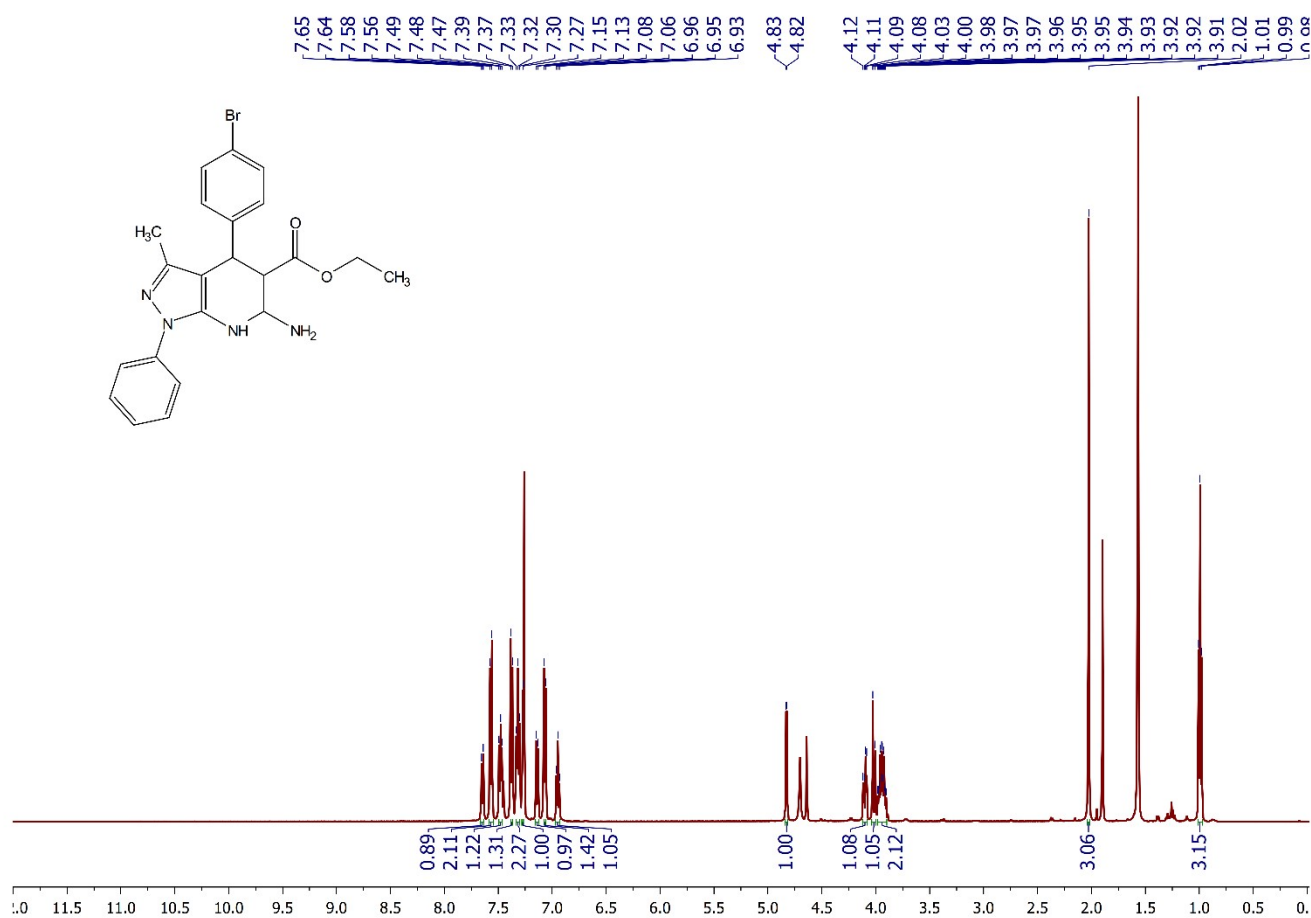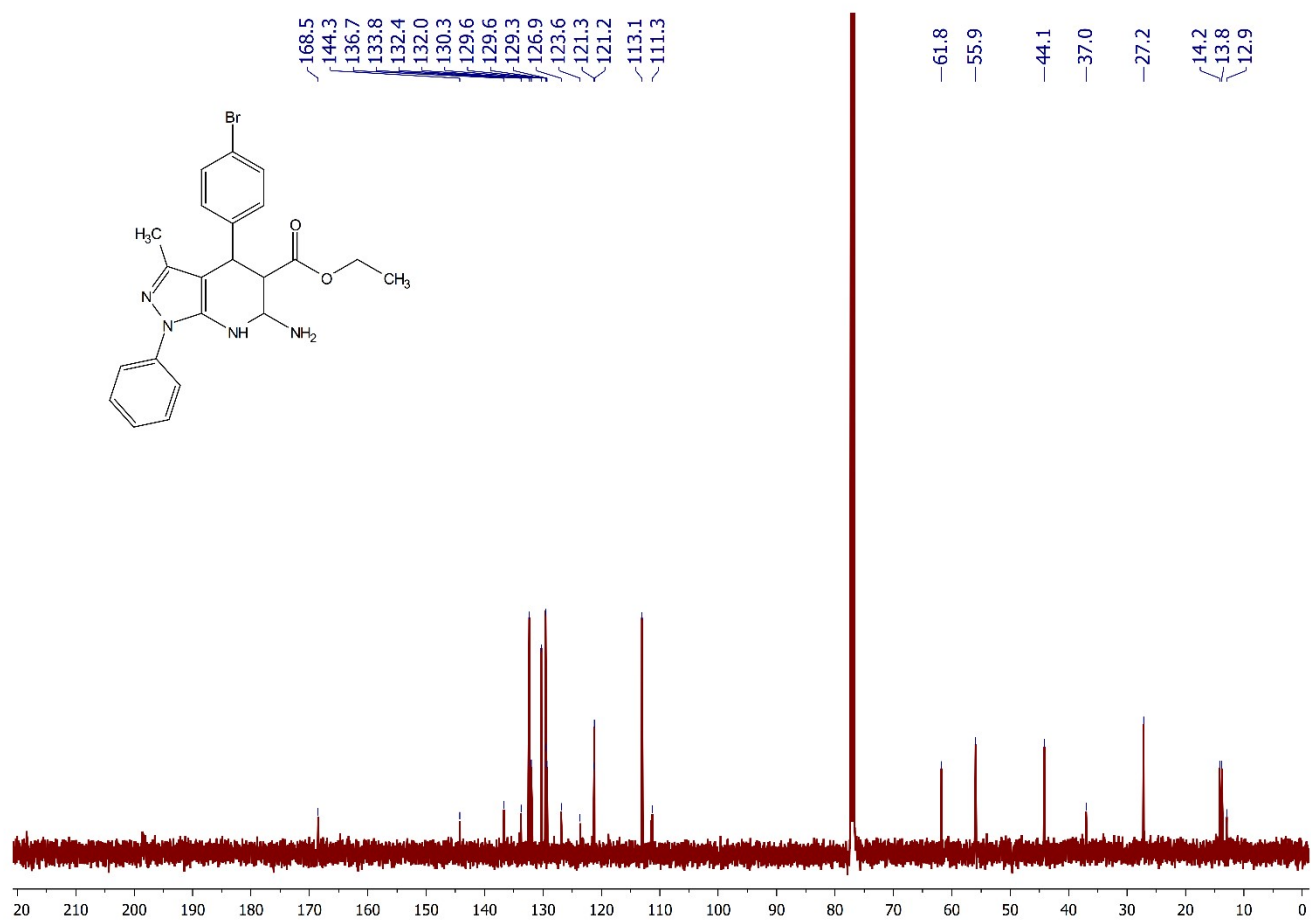

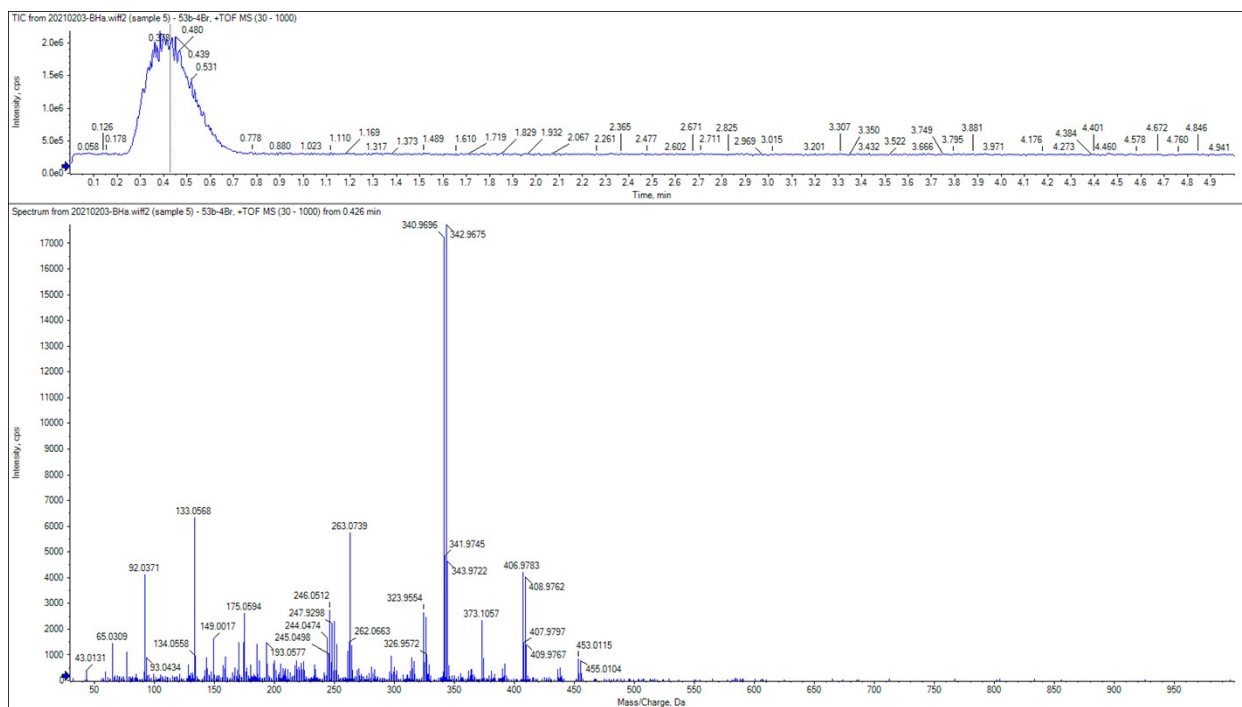

**<sup>1</sup>H, <sup>13</sup>C NMR, and HRMS spectroscopy of Ethyl 6-amino-4-(furan-2-yl)-3-methyl-1-phenyl-4,5,6,7-tetrahydro-1H-pyrazolo[3,4-b]pyridine-5-carboxylate (Compound 8b)**

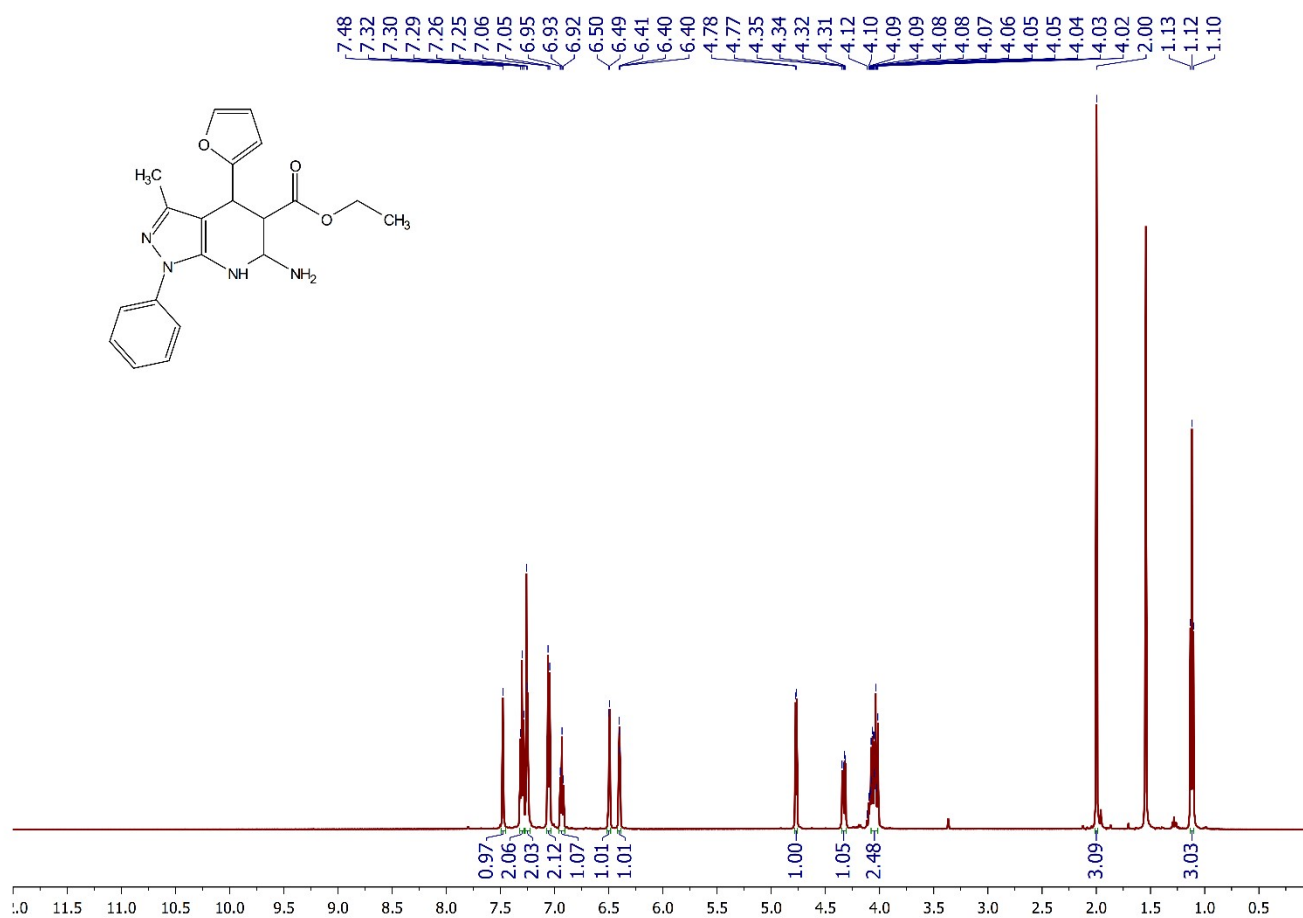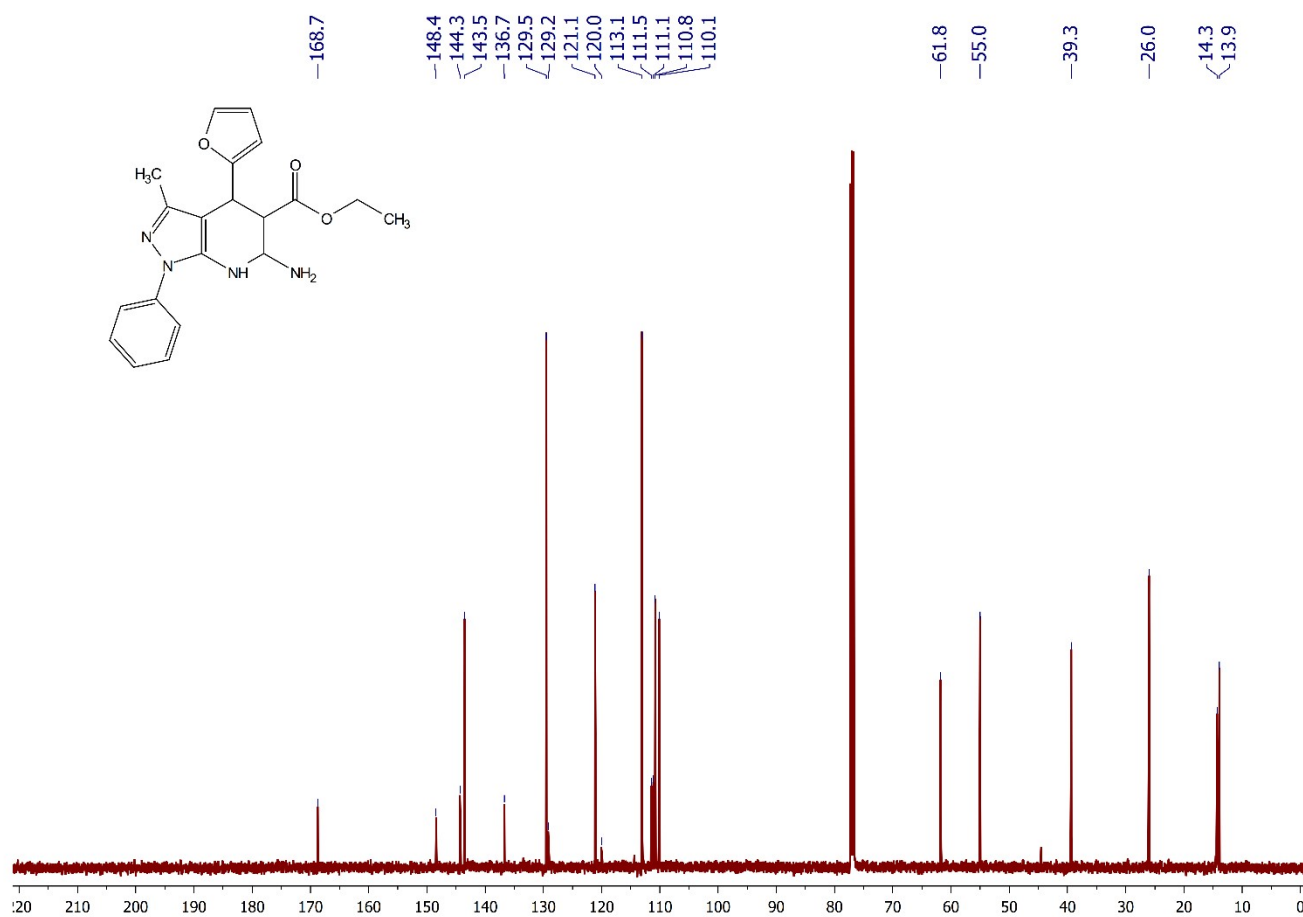

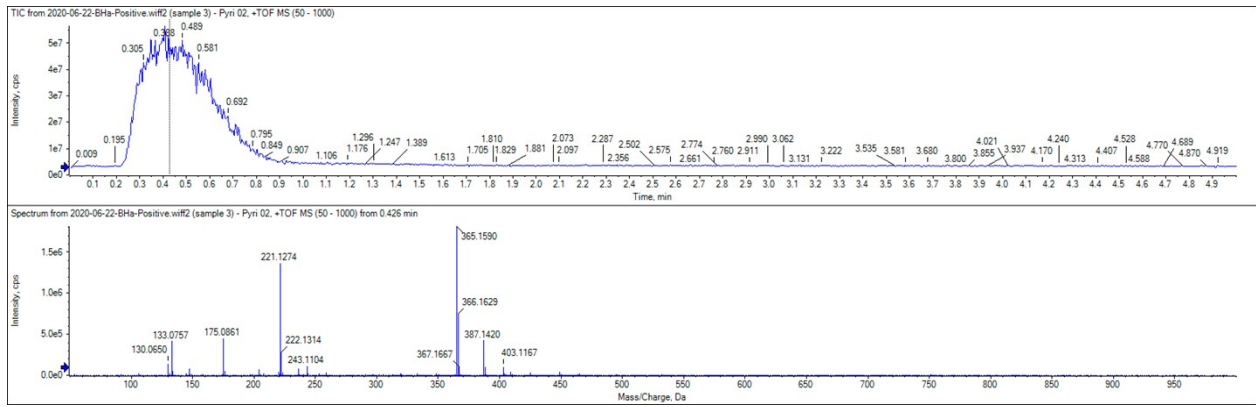

**<sup>1</sup>H, <sup>13</sup>C NMR, and HRMS spectroscopy of Ethyl 6-amino-3-methyl-4-(5-nitrofuran-2-yl)-1-phenyl-4,5,6,7-tetrahydro-1*H*-pyrazolo[3,4-*b*]pyridine-5-carboxylate (Compound 9b)**

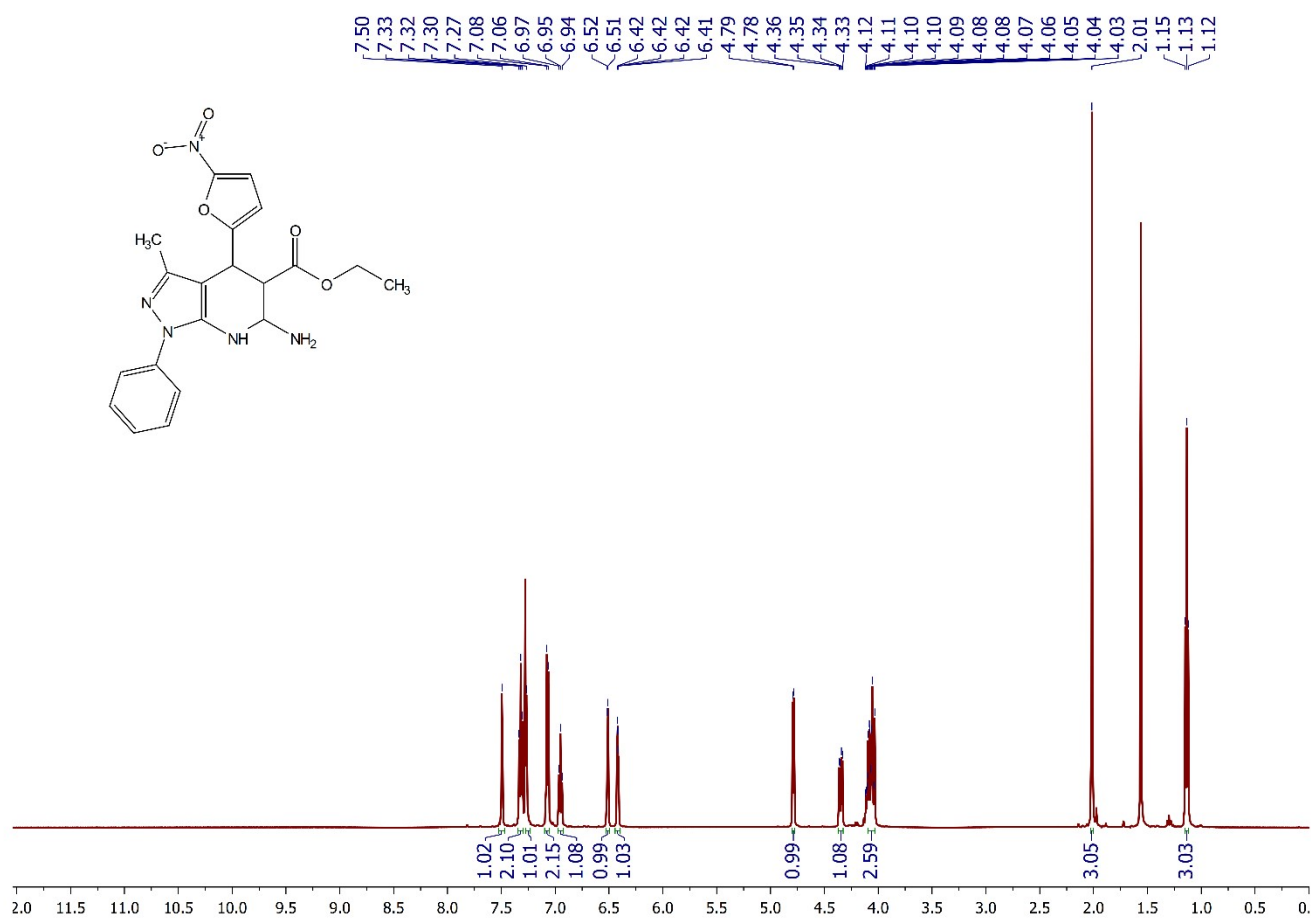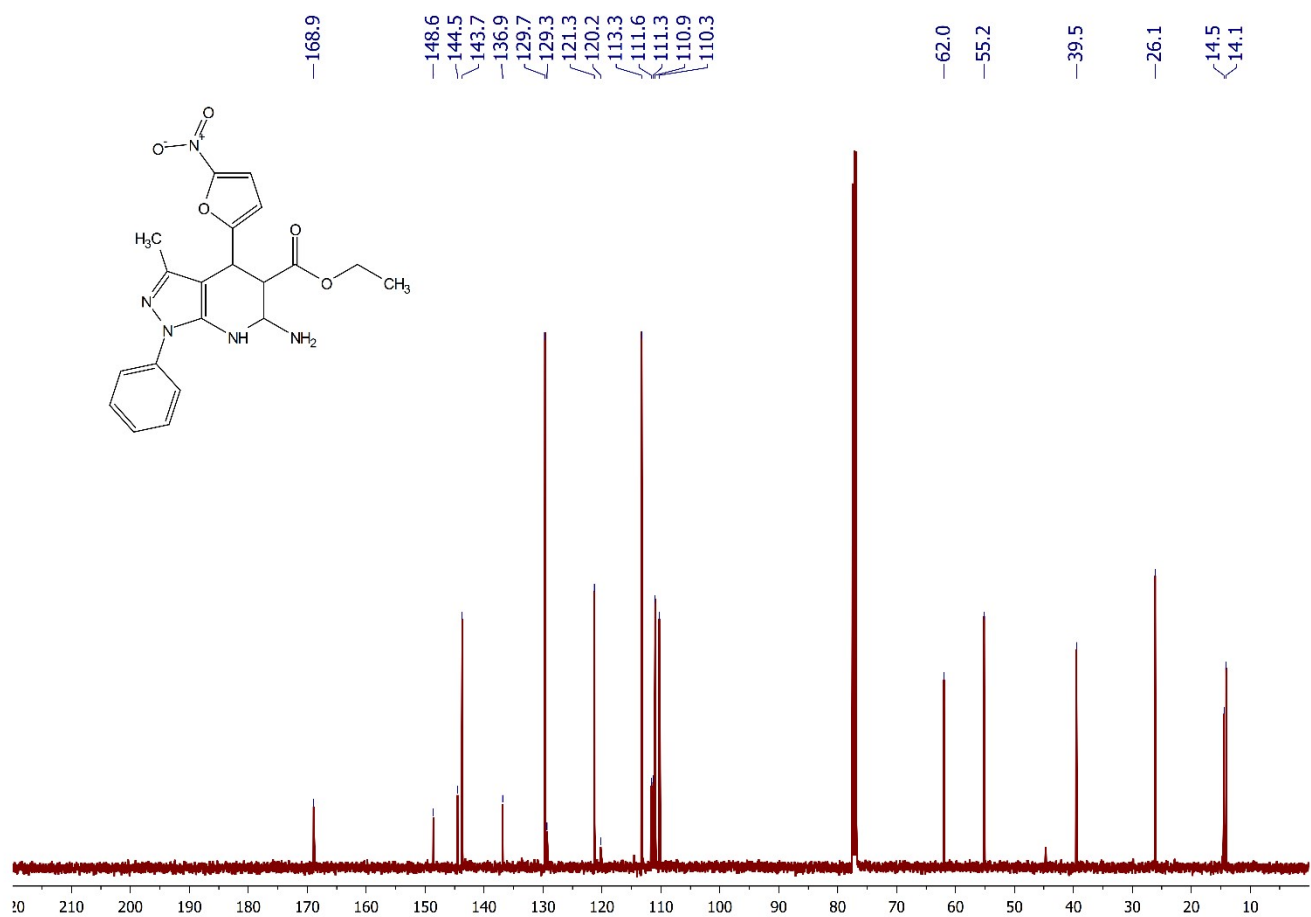

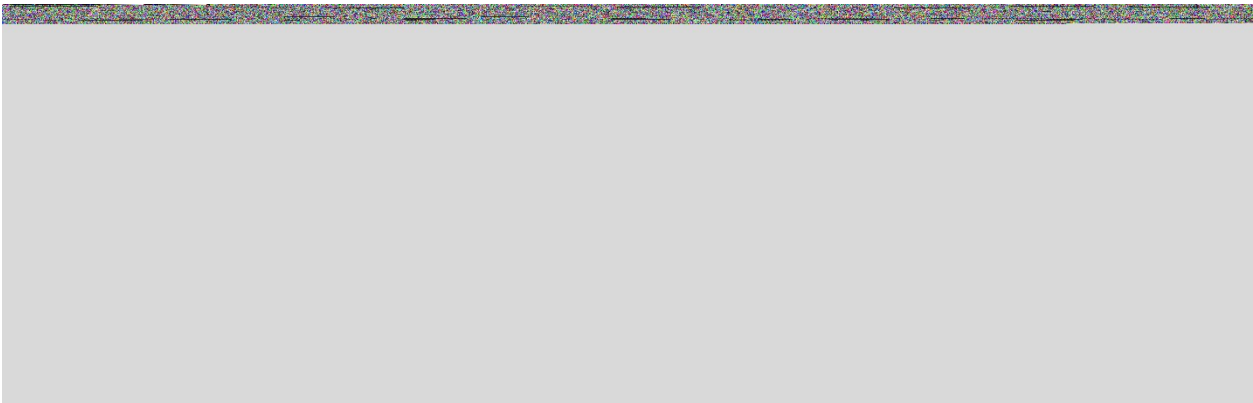

Supplement: d2ra07521k1.pdf [file d2ra07521k1.pdf]
